# Supplementary material
Source: MDPI journal article supplement (https://www.mdpi.com/search?q=molecules-23-03125)
Supplement: s001 [file molecules-23-03125-s001.pdf]

# Identification, characterization and quantification of process-related and degradation impurities in Lisdexamfetamine dimesylate: Two identified as new compounds

Shenghua Gao<sup>1</sup>, Lili Meng<sup>1</sup>, Chunjie Zhao<sup>2</sup>, Tao Zhang<sup>1</sup>, Pengcheng Qiu<sup>1,\*</sup> and Fuli Zhang<sup>1,\*</sup>

\* Correspondence: [zhangfuli@sinopharm.com](mailto:zhangfuli@sinopharm.com)(F.Z.); [pcqiu@aliyun.com](mailto:pcqiu@aliyun.com) (P.Q.);

Tel.:+86-21-2057-2000(ext.5036) (F.Z.); +86-21-2057-2000(ext.5077) (P.Q.)

## Supporting Information

### Table of contents

|                                                                                 |        |
|---------------------------------------------------------------------------------|--------|
| <b>Figure S5</b> The LC-MS spectrum of LDX and its impurities                   | P2-P7  |
| <b>Figure S6</b> The spectrum of Imp-B and Imp-C in normal-phase chromatography | P7     |
| <b>Figure S7</b> NMR, HRMS and IR spectrogram of LDX and its impurities         | P8-P47 |

**Figure S5** The LC-MS spectrum of LDX and its impurities

(a) The LC chromatogram of LDX and its impurities;

(b) The MS spectrum of Imp-L;

(c) The MS spectrum of Imp-M;

(d) The MS spectrum of Imp-A;

(e) The MS spectrum of Imp-H;

(f) The MS spectrum of LDX;

(g) The MS spectrum of Imp-E;

(h) The MS spectrum of Imp-D;

(i) The MS spectrum of Imp-B or C;

(j) The MS spectrum of Imp-K;

(k) The MS spectrum of Imp-G;

(l) The MS spectrum of Imp-F;

(m) The MS spectrum of Imp-J.

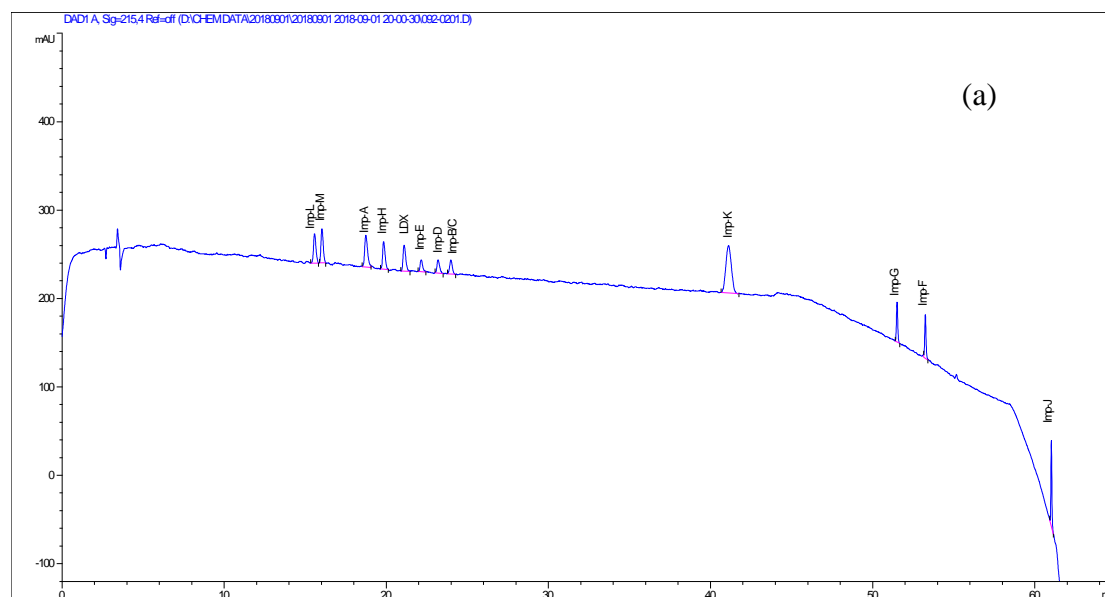

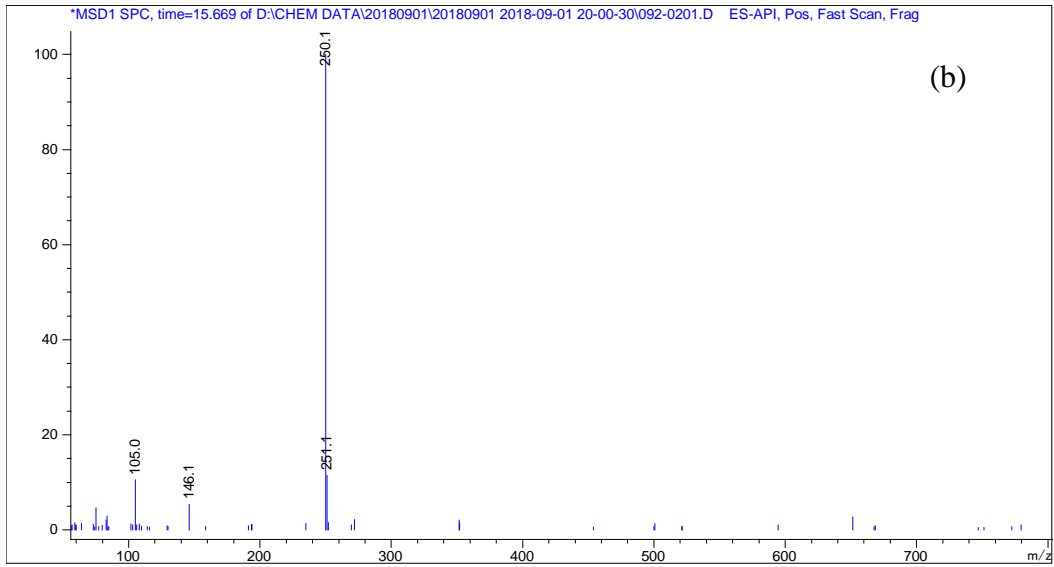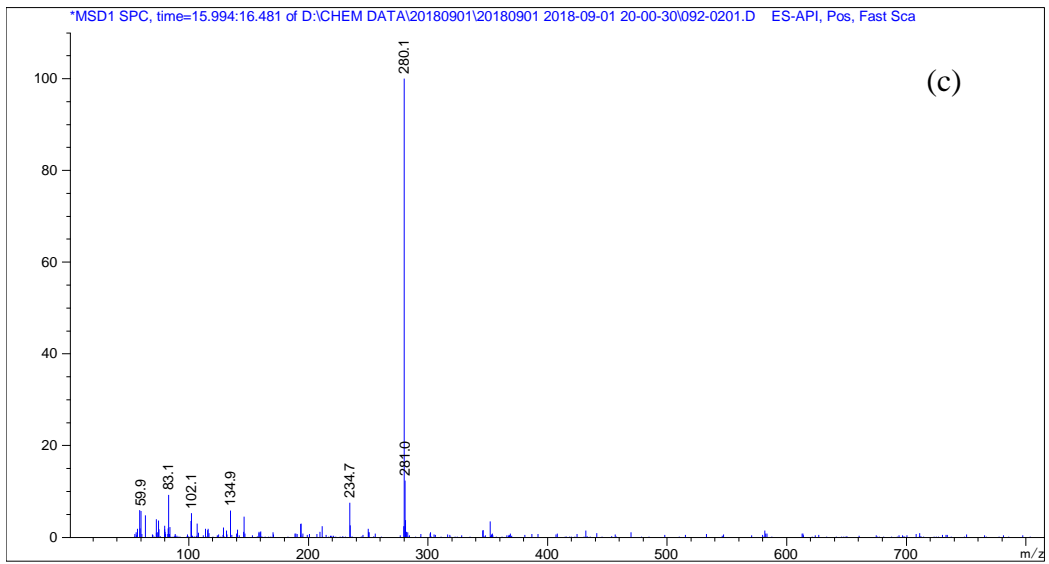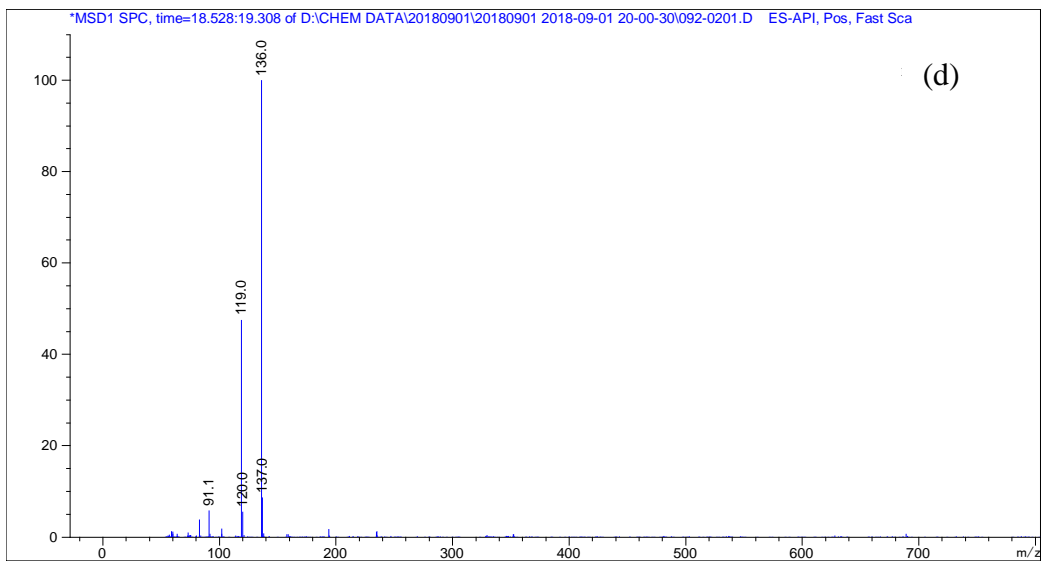

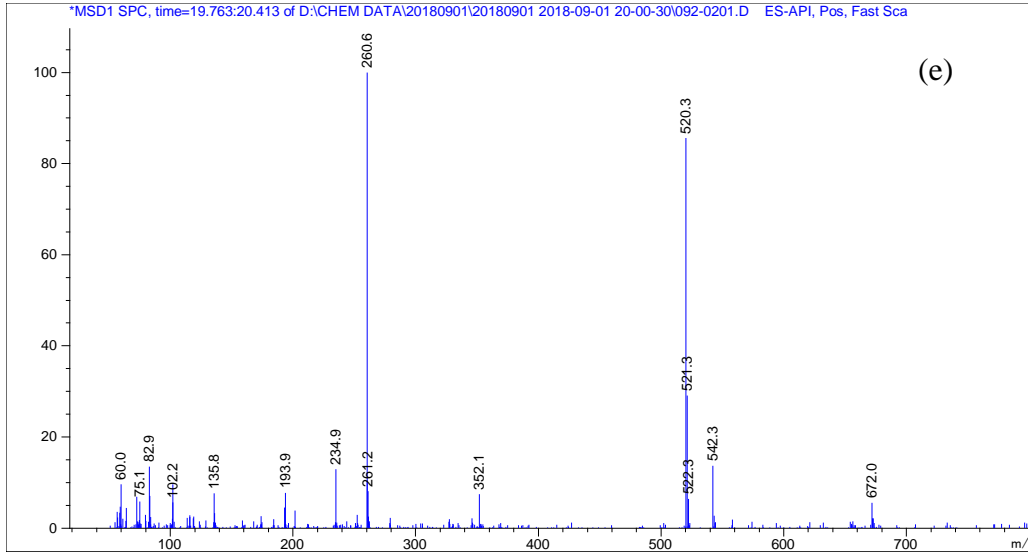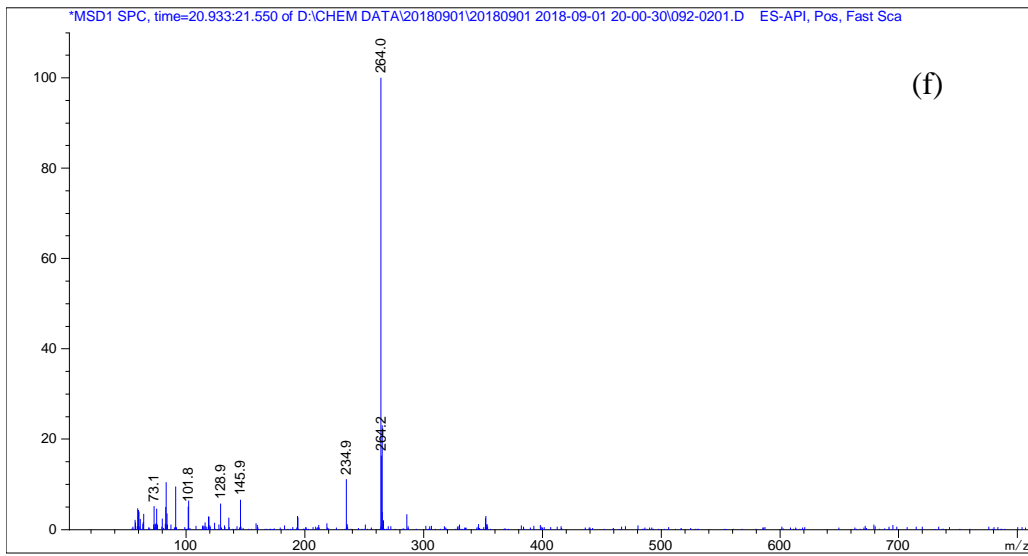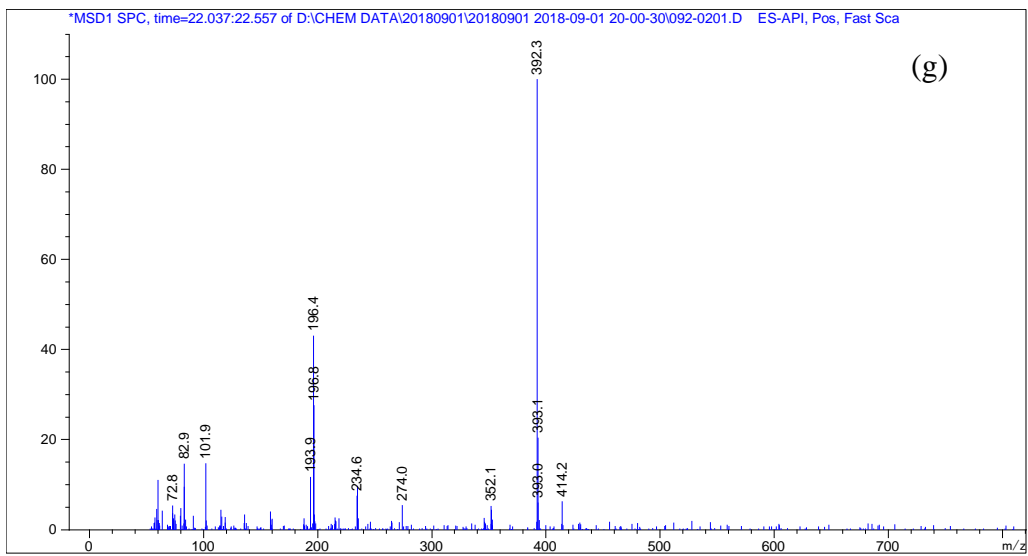

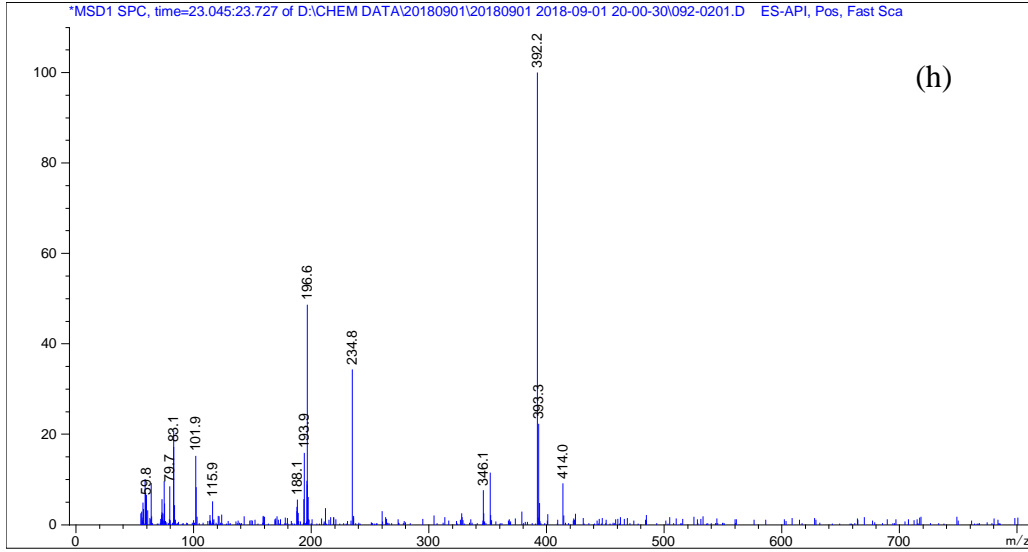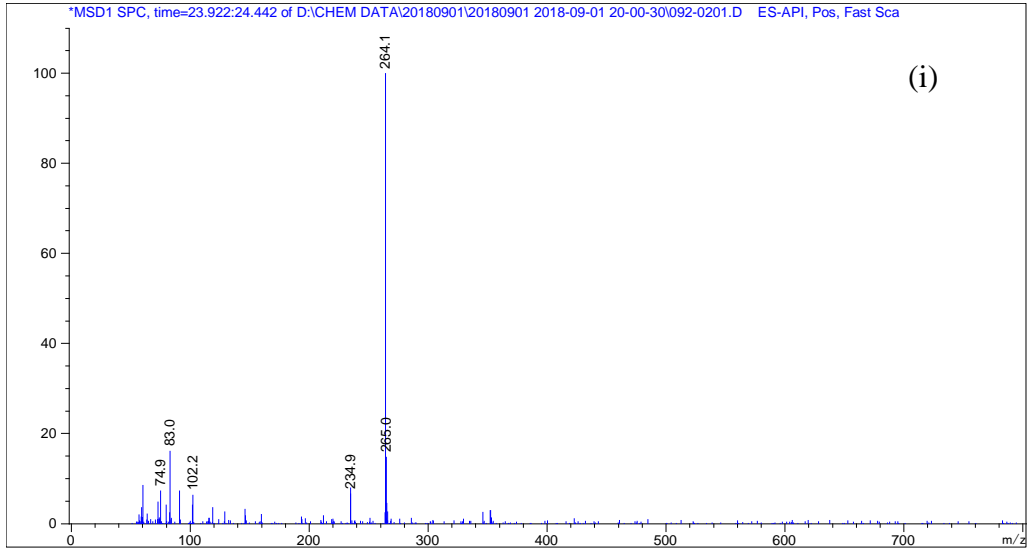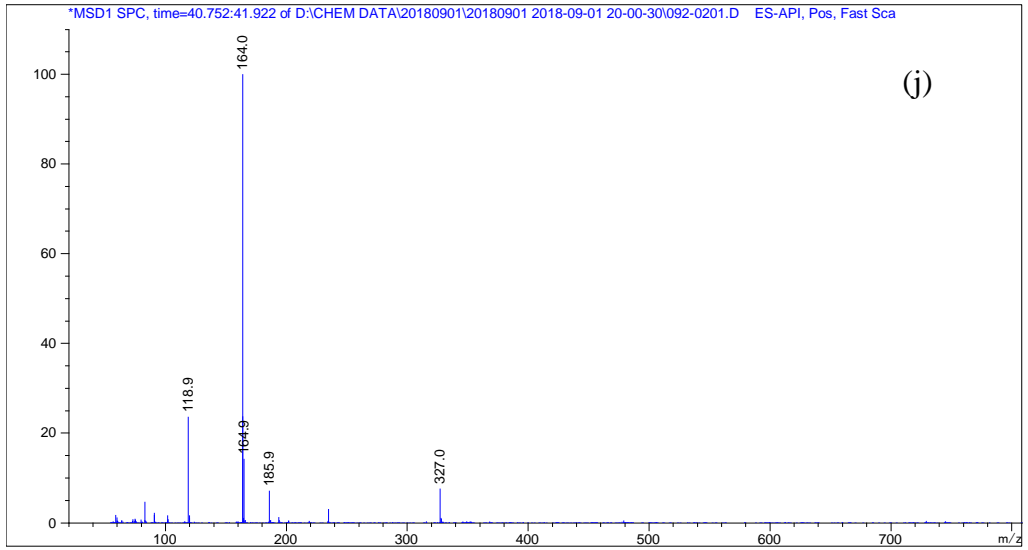

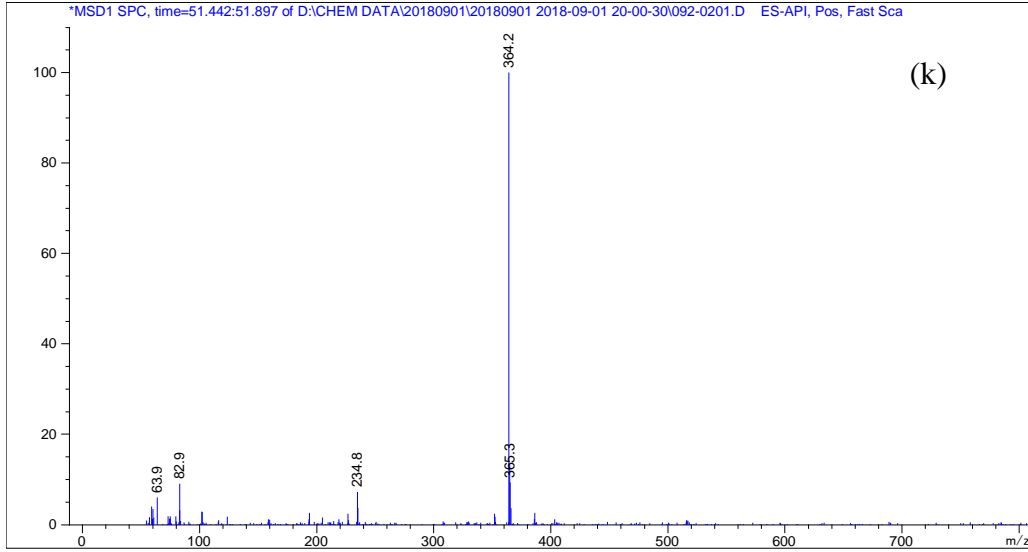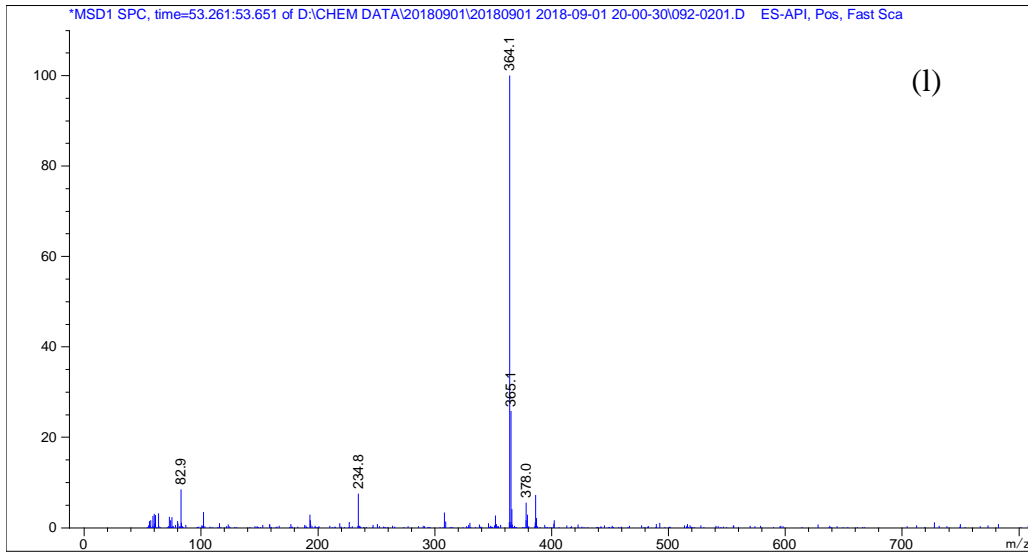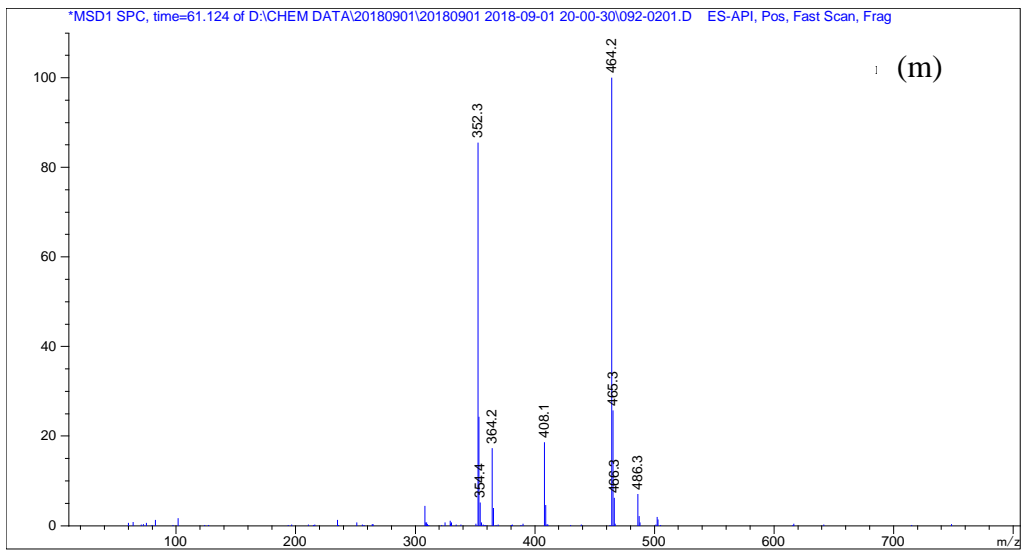

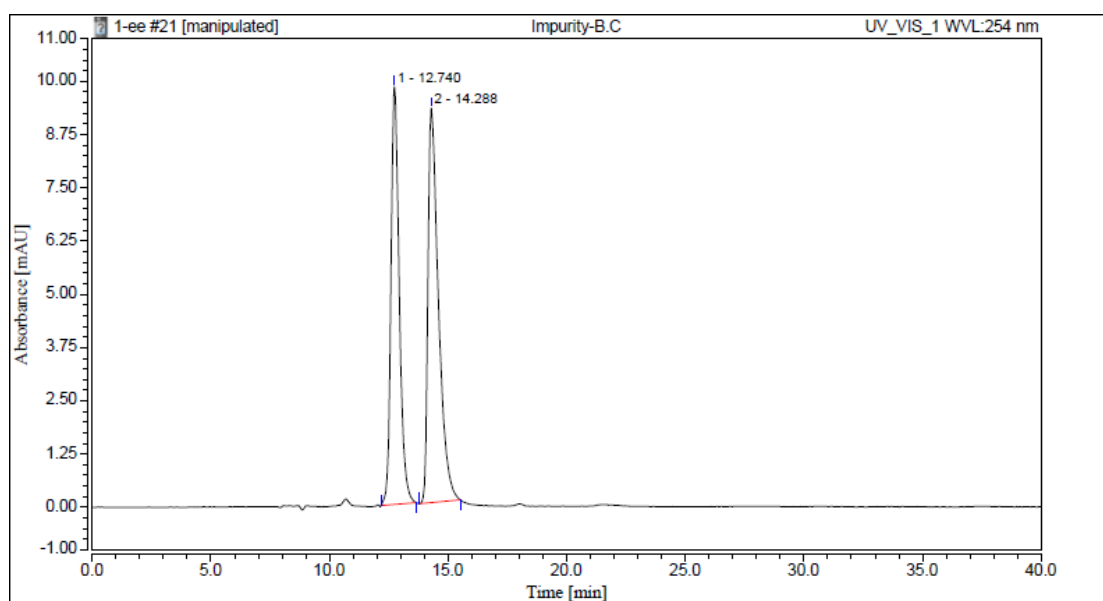

**Figure S6** The spectrum of Imp-B and Imp-C in normal-phase chromatography

**FigureS7** The spectrums of LDX and its impurities

- (X-1) the  $^1\text{H}$  NMR spectrum of LDX;
- (X-2) the  $^{13}\text{C}$  NMR spectrum of LDX;
- (X-3) the DEPT spectrum of LDX;
- (X-4) the IR spectrum of LDX;
- (X-5) the HRMS spectrum of LDX;
- (A-1) the  $^1\text{H}$  NMR spectrum of Imp-A;
- (A-2) the  $^{13}\text{C}$  NMR spectrum of Imp-A;
- (A-3) the DEPT spectrum of Imp-A;
- (A-4) the IR spectrum of Imp-A;
- (A-5) the HRMS spectrum of Imp-A;
- (B-1) the  $^1\text{H}$  NMR spectrum of Imp-B;
- (C-1) the  $^1\text{H}$  NMR spectrum of Imp-C;
- (C-2) the  $^{13}\text{C}$  NMR spectrum of Imp-C;
- (C-3) the DEPT spectrum of Imp-C;
- (C-4) the HRMS spectrum of Imp-C;
- (D-1) the  $^1\text{H}$  NMR spectrum of Imp-D;
- (D-2) the  $^{13}\text{C}$  NMR spectrum of Imp-D;
- (D-3) the DEPT spectrum of Imp-D;
- (D-4) the HSQC spectrum of Imp-D;
- (D-5) the HMBC spectrum of Imp-D;
- (D-6) the enlarged view of the HMBC spectrum of Imp-D;
- (D-7) the IR spectrum of Imp-D;
- (D-8) the HRMS spectrum of Imp-D;
- (E-1) the  $^1\text{H}$  NMR spectrum of Imp-E;
- (E-2) the  $^{13}\text{C}$  NMR spectrum of Imp-E;
- (E-3) the DEPT spectrum of Imp-E;
- (E-4) the HSQC spectrum of Imp-E;
- (E-5) the HMBC spectrum of Imp-E;
- (E-6) the enlarged view of the HMBC spectrum of Imp-E;



(E-7) the IR spectrum of Imp-E;  
(E-8) the HRMS spectrum of Imp-E;  
(F-1) the  $^1\text{H}$  NMR spectrum of Imp-F;  
(F-2) the  $^{13}\text{C}$  NMR spectrum of Imp-F;  
(F-3) the DEPT spectrum of Imp-F;  
(F-4) the IR spectrum of Imp-F;  
(F-5) the HRMS spectrum of Imp-F;  
(G-1) the  $^1\text{H}$  NMR spectrum of Imp-G;  
(G-2) the  $^{13}\text{C}$  NMR spectrum of Imp-G;  
(G-3) the DEPT spectrum of Imp-G;  
(G-4) the IR spectrum of Imp-G;  
(G-5) the HRMS spectrum of Imp-G;  
(H-1) the  $^1\text{H}$  NMR spectrum of Imp-H;  
(H-2) the  $^{13}\text{C}$  NMR spectrum of Imp-H;  
(H-3) the DEPT spectrum of Imp-H;  
(H-4) the HMBC spectrum of Imp-H;  
(H-5) the enlarged view of the HMBC spectrum of Imp-H;  
(H-6) the HSQC spectrum of Imp-H;  
(H-7) the COSY spectrum of Imp-H;  
(H-8) the enlarged view of the COSY spectrum of Imp-H;  
(H-9) the IR spectrum of Imp-H;  
(H-10) the HRMS spectrum of Imp-H;  
(J-1) the  $^1\text{H}$  NMR spectrum of Imp-J;  
(J-2) the  $^{13}\text{C}$  NMR spectrum of Imp-J;  
(J-3) the DEPT spectrum of Imp-J;  
(J-4) the HRMS spectrum of Imp-J;  
(K-1) the  $^1\text{H}$  NMR spectrum of Imp-K;  
(K-2) the  $^{13}\text{C}$  NMR spectrum of Imp-K;  
(K-3) the HRMS spectrum of Imp-K;  
(L-1) the  $^1\text{H}$  NMR spectrum of Imp-L;

- (L-2) the  $^{13}\text{C}$  NMR spectrum of Imp-L;
- (L-3) the DEPT spectrum of Imp-L;
- (L-4) the IR spectrum of Imp-L;
- (L-5) the HRMS spectrum of Imp-L;
- (M-1) the  $^1\text{H}$  NMR spectrum of Imp-M;
- (M-2) the  $^{13}\text{C}$  NMR spectrum of Imp-M;
- (M-3) the DEPT spectrum of Imp-M;
- (M-4) the COSY spectrum of Imp-M;
- (M-5) the HSQC spectrum of Imp-M;
- (M-6) the HMBC spectrum of Imp-M;
- (M-7) the enlarged view of the HMBC spectrum of Imp-M;
- (M-8) the enlarged view of the HMBC spectrum of Imp-M;
- (M-9) the HRMS spectrum of Imp-M;
- (N-1) the  $^1\text{H}$  NMR spectrum of B-3;
- (N-2) the  $^1\text{H}$  NMR spectrum of B-2;

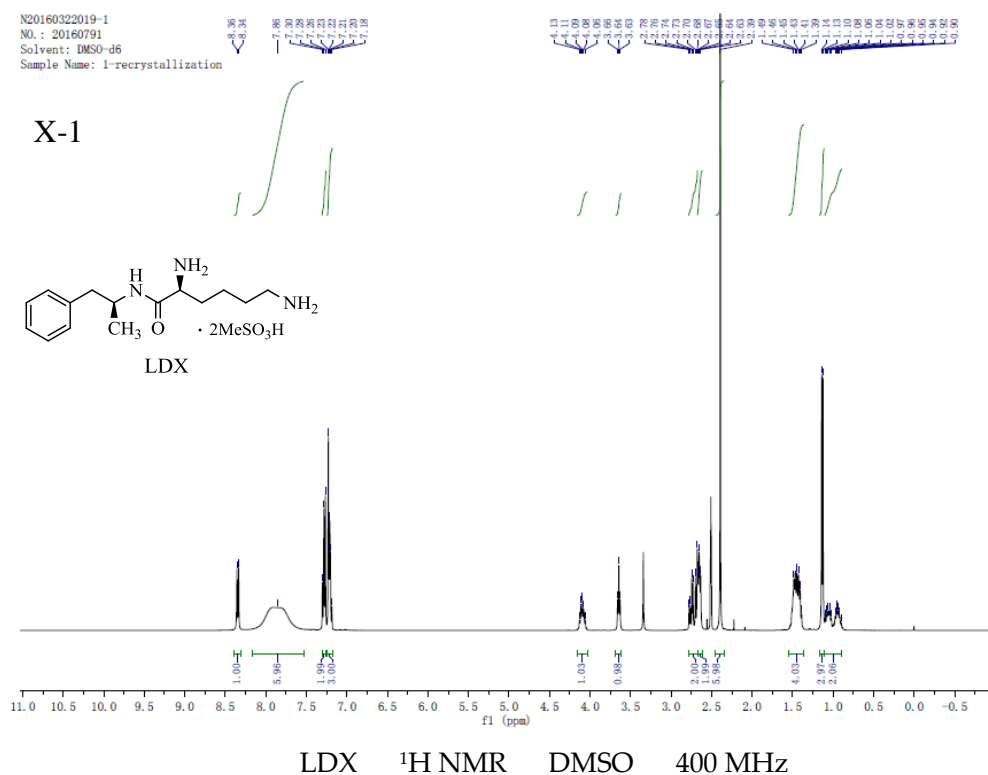

N20160322019-1  
NO : 20160791  
Solvent: DMSO-d6  
Sample Name: 1-recrystallization

X-2

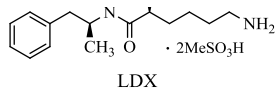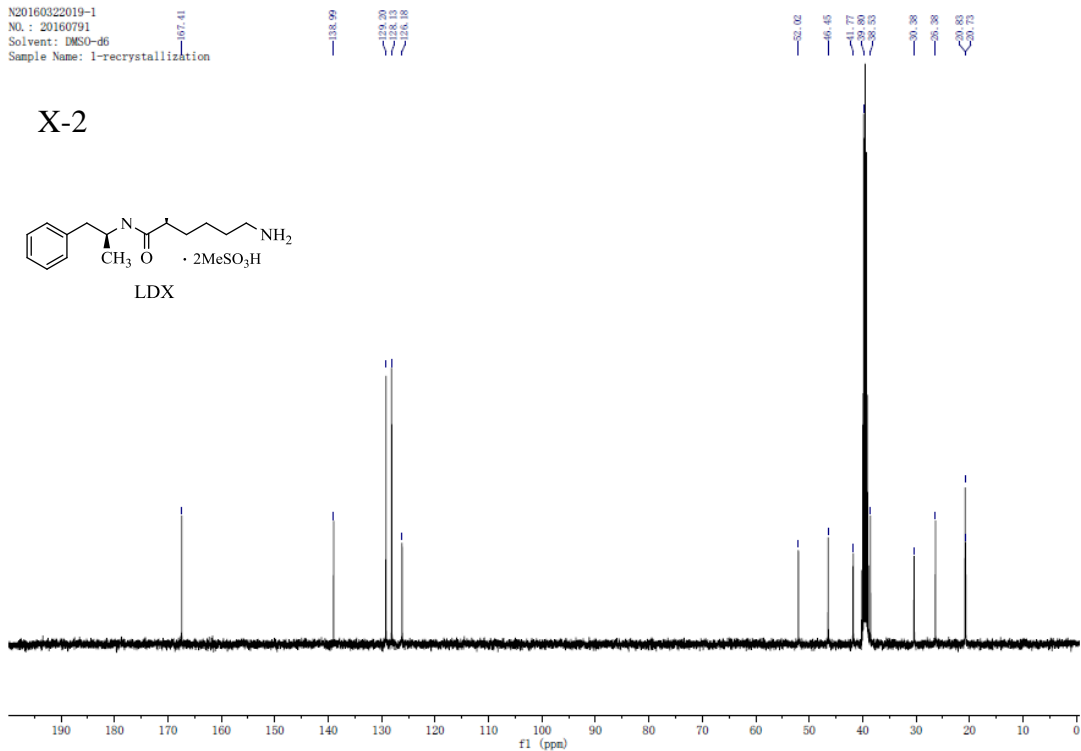

LDX <sup>13</sup>C NMR DMSO 101 MHz

N20160322019-1  
NO : 20160791  
Solvent: DMSO-d6  
Sample Name: 1-recrystallization

X-3

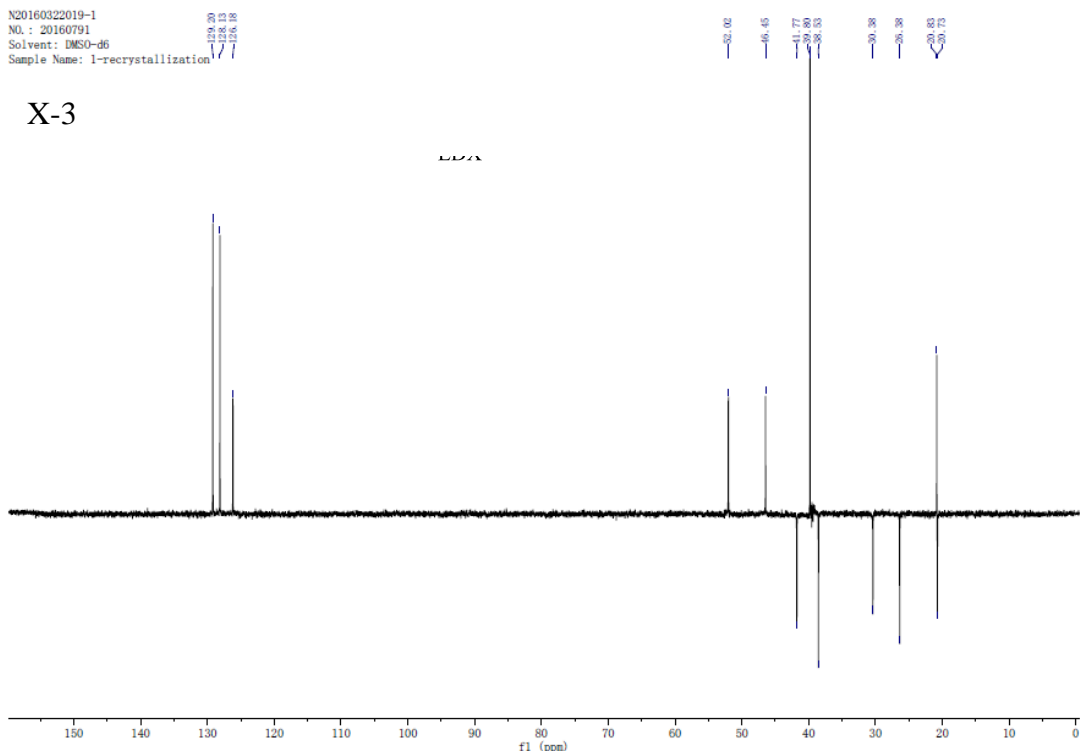

LDX DEPT DMSO 101 MHz

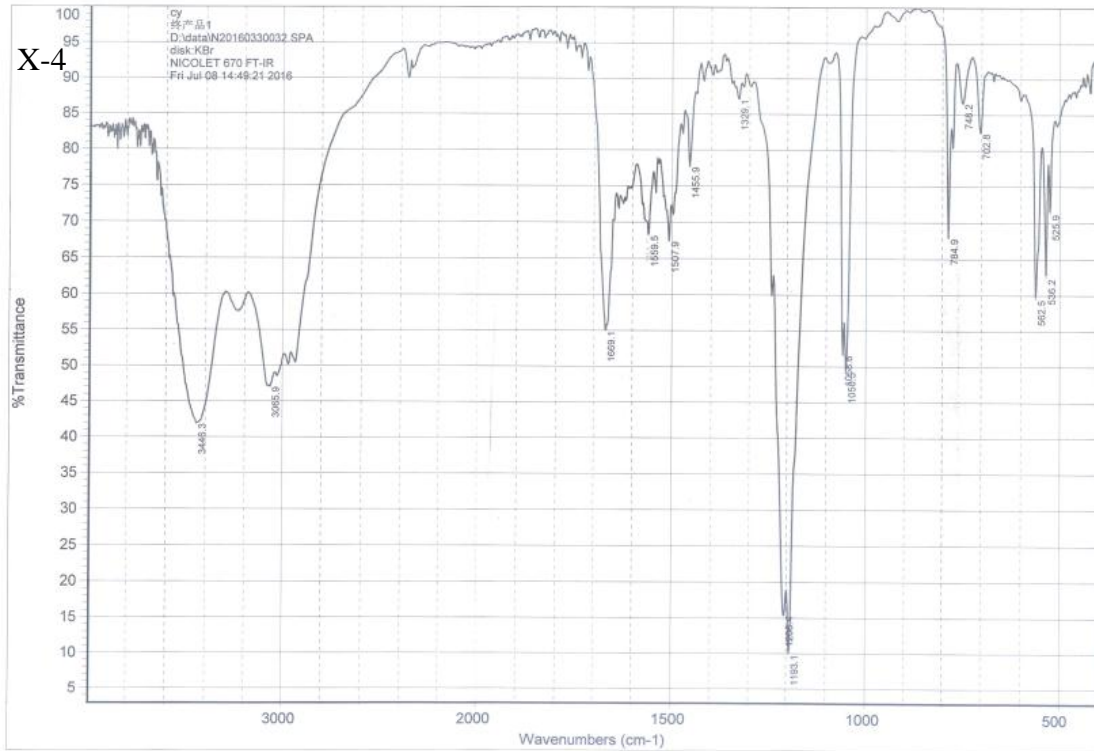

LDX IR

X-5

### Qualitative Compound Report

|                 |                |                        |              |
|-----------------|----------------|------------------------|--------------|
| Data File       | 20160630-017.d | Sample Name            | LYBBA-1      |
| Sample Type     | Sample         | Position               | Vial 50      |
| Instrument Name | Instrument 1   | User Name              |              |
| Acq Method      |                | IRM Calibration Status | Success      |
| DA Method       | MS.m           | Comment                | N20160530015 |

#### Compound Table

| Compound Label      | RT    | Mass     | Abund   | Formula      | Tgt Mass | Diff (ppm) |
|---------------------|-------|----------|---------|--------------|----------|------------|
| Cpd 1: C15 H25 N3 O | -0.24 | 263.2004 | 1178593 | C15 H25 N3 O | 263.1998 | 2.3        |

| Compound Label      | RT    | Algorithm       | Mass     |
|---------------------|-------|-----------------|----------|
| Cpd 1: C15 H25 N3 O | -0.24 | Find By Formula | 263.2004 |

#### MS Zoomed Spectrum

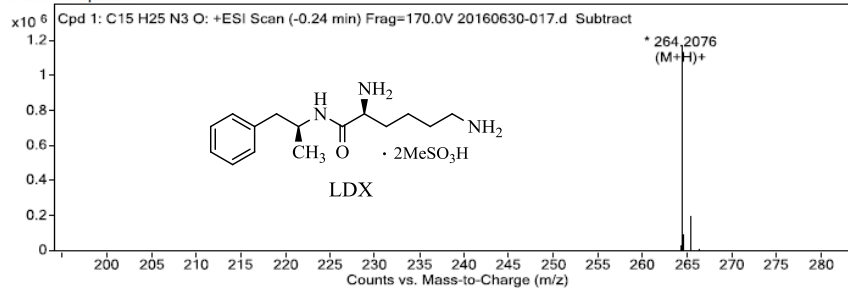

#### MS Spectrum Peak List

| m/z      | Calc m/z | Diff(ppm) | Abund   | Formula      | Ion    |
|----------|----------|-----------|---------|--------------|--------|
| 264.2076 | 264.207  | 2.3       | 1178593 | C15 H26 N3 O | (M+H)+ |

N20160318005  
NO.: 20160707  
Solvent: DMSO-d6  
Sample Name: 3-20151125

A-1

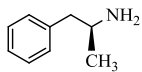

Imp-A

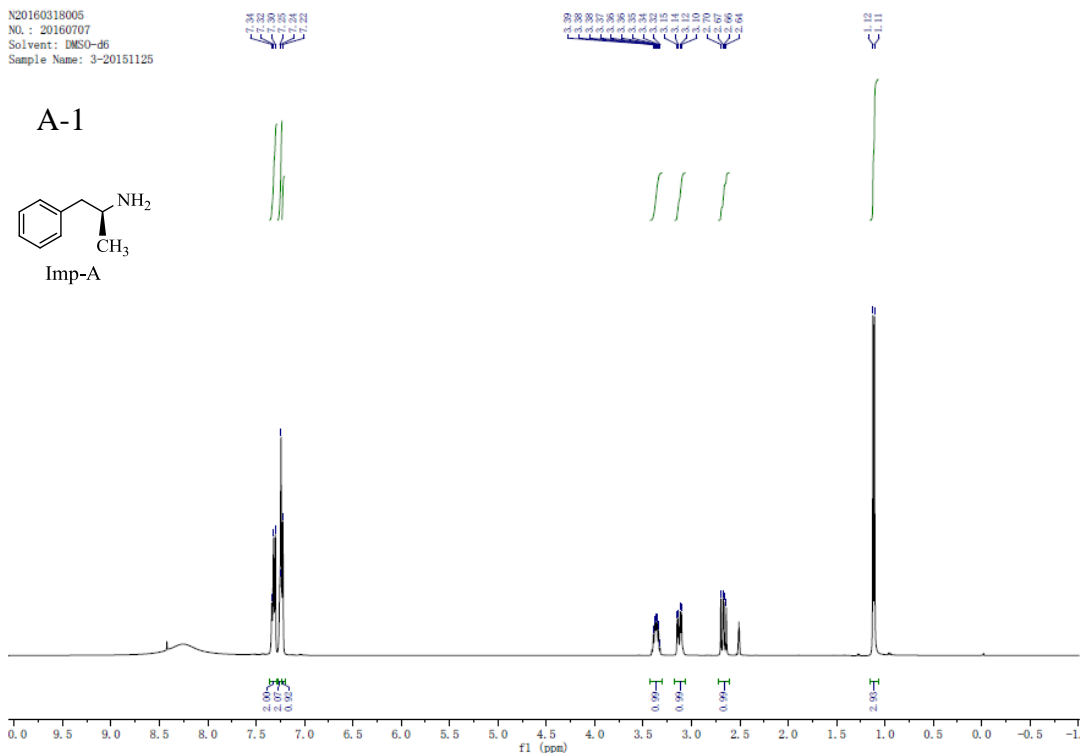

Imp-A <sup>1</sup>H NMR DMSO 400 MHz

N20160713021  
NO.: 201612052  
Solvent: DMSO-d6  
Sample Name: intermediate 3

A-2

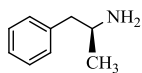

Imp-A

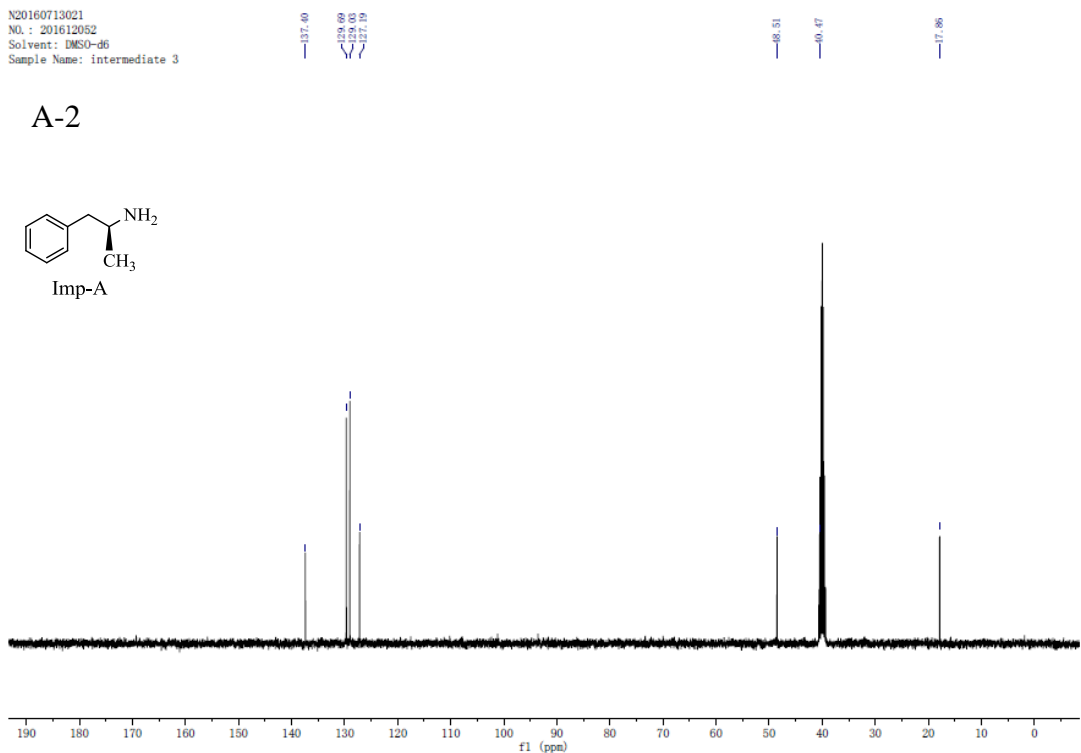

Imp-A <sup>13</sup>C NMR DMSO 101 MHz

N20160713021  
NO.: 201612052  
Solvent: DMSO-d6  
Sample Name: intermediate 3

A-3

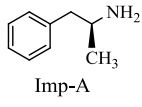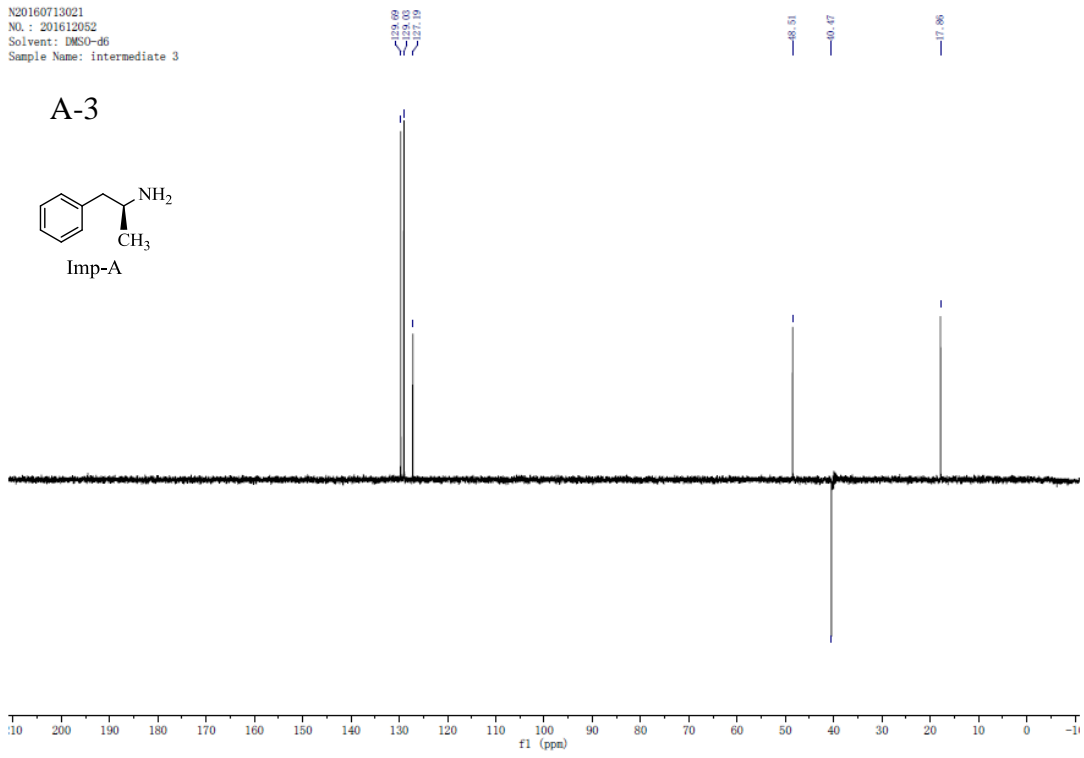

Imp-A DEPT DMSO 101 MHz

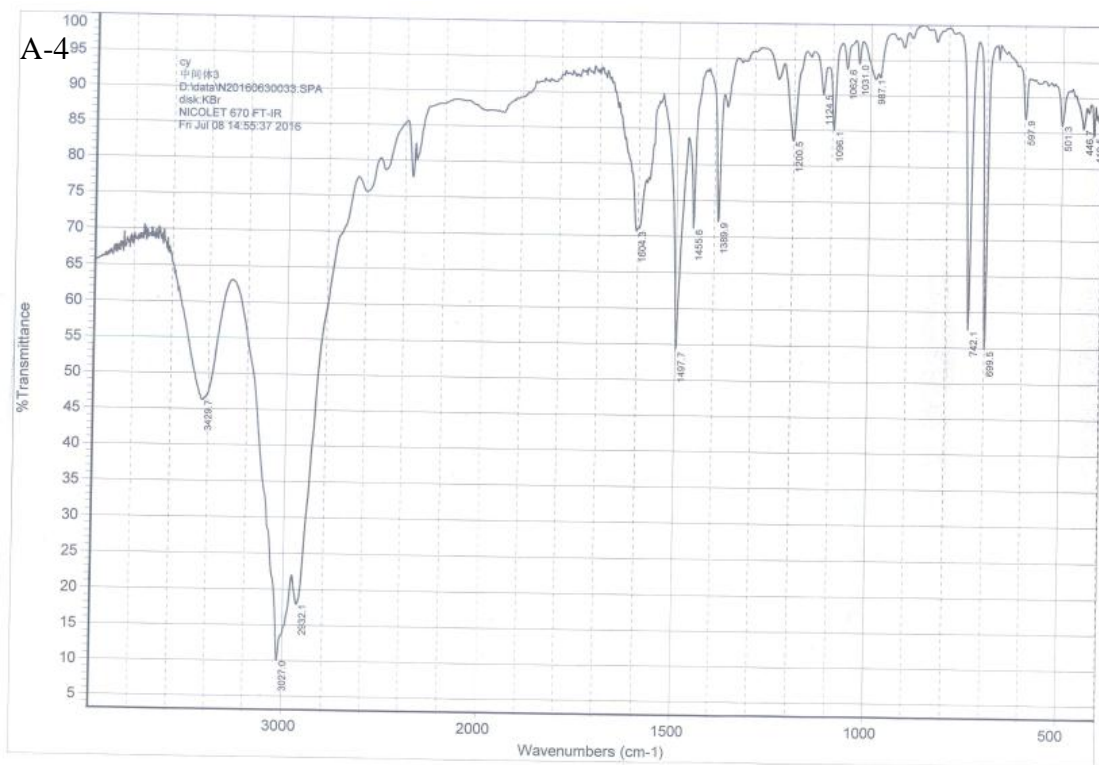

Imp-A IR

## Qualitative Compound Report

|                 |                |                        |              |
|-----------------|----------------|------------------------|--------------|
| Data File       | 20160706-001.d | Sample Name            | Int-3        |
| Sample Type     | Sample         | Position               | Vial 76      |
| Instrument Name | Instrument 1   | User Name              |              |
| Acq Method      |                | IRM Calibration Status | Success      |
| DA Method       | MS.m           | Comment                | N20160706003 |

## Compound Table

| Compound Label  | RT   | Mass     | Abund  | Formula  | Tgt Mass | Diff (ppm) |
|-----------------|------|----------|--------|----------|----------|------------|
| Cpd 1: C9 H13 N | 0.17 | 135.1048 | 264278 | C9 H13 N | 135.1048 | -0.11      |

| Compound Label  | RT   | Algorithm       | Mass     |
|-----------------|------|-----------------|----------|
| Cpd 1: C9 H13 N | 0.17 | Find By Formula | 135.1048 |

## MS Zoomed Spectrum

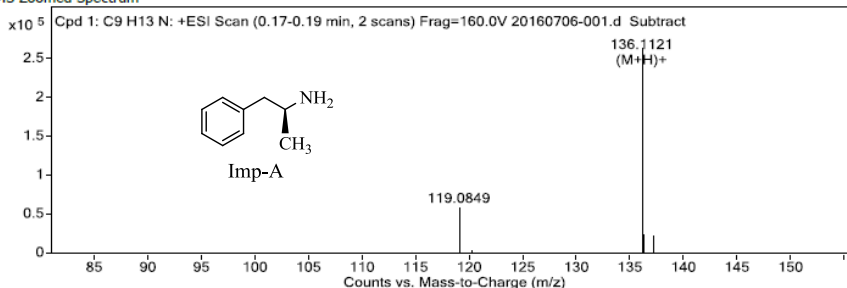

## MS Spectrum Peak List

| m/z      | Calc m/z | Diff(ppm) | z | Abund  | Formula  | Ion    |
|----------|----------|-----------|---|--------|----------|--------|
| 136.1121 | 136.1121 | -0.11     | 1 | 264278 | C9 H14 N | (M+H)+ |

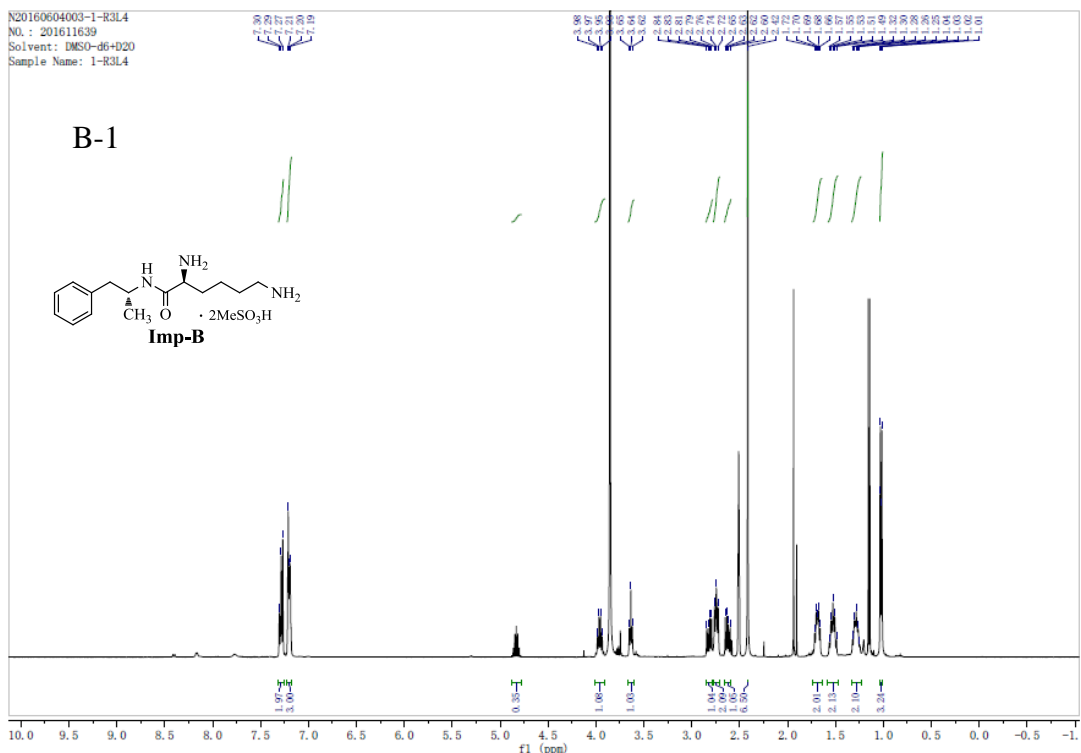Imp-B  $^1\text{H}$  NMR DMSO 400 MHz





N20160711002  
 NO.: 201612015  
 Solvent: DMSO-d6  
 Sample Name: Impurity C

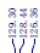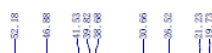

C-3

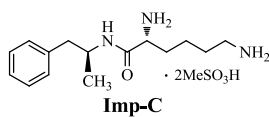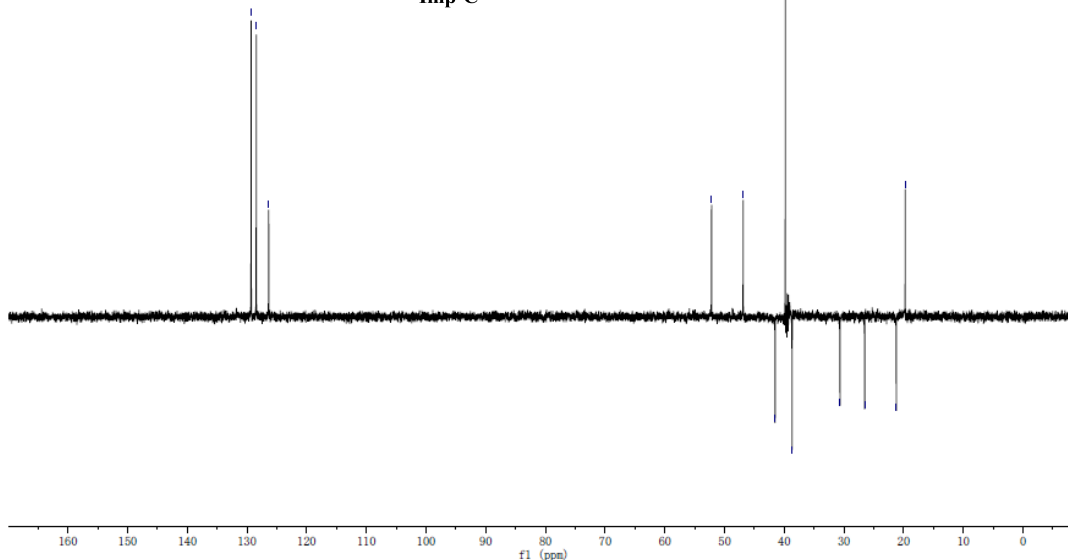

Imp-C DEPT DMSO 101 MHz

C-4

### Qualitative Compound Report

|                 |                |                        |              |
|-----------------|----------------|------------------------|--------------|
| Data File       | 20160630-015.d | Sample Name            | Impurity C   |
| Sample Type     | Sample         | Position               | Vial 49      |
| Instrument Name | Instrument 1   | User Name              |              |
| Acq Method      |                | IRM Calibration Status | Success      |
| DA Method       | MS.m           | Comment                | N20160630031 |

#### Compound Table

| Compound Label      | RT    | Mass     | Abund  | Formula      | Tgt Mass | Diff (ppm) |
|---------------------|-------|----------|--------|--------------|----------|------------|
| Cpd 1: C15 H25 N3 O | -0.25 | 263.1997 | 660907 | C15 H25 N3 O | 263.1998 | -0.37      |

| Compound Label      | RT    | Algorithm       | Mass     |
|---------------------|-------|-----------------|----------|
| Cpd 1: C15 H25 N3 O | -0.25 | Find By Formula | 263.1997 |

#### MS Zoomed Spectrum

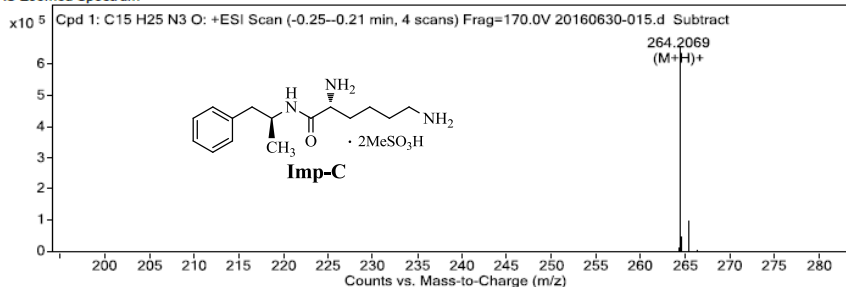

#### MS Spectrum Peak List

| m/z      | Calc m/z | Diff(ppm) | Abund  | Formula      | Ion    |
|----------|----------|-----------|--------|--------------|--------|
| 264.2069 | 264.207  | -0.36     | 660907 | C15 H26 N3 O | (M+H)+ |

--- End Of Report ---



N20160629001  
 NO.: 201611869  
 Solvent: DMSO-d6  
 Sample Name: impurity D

D-3

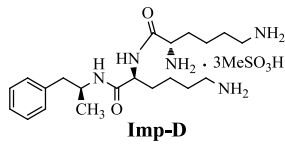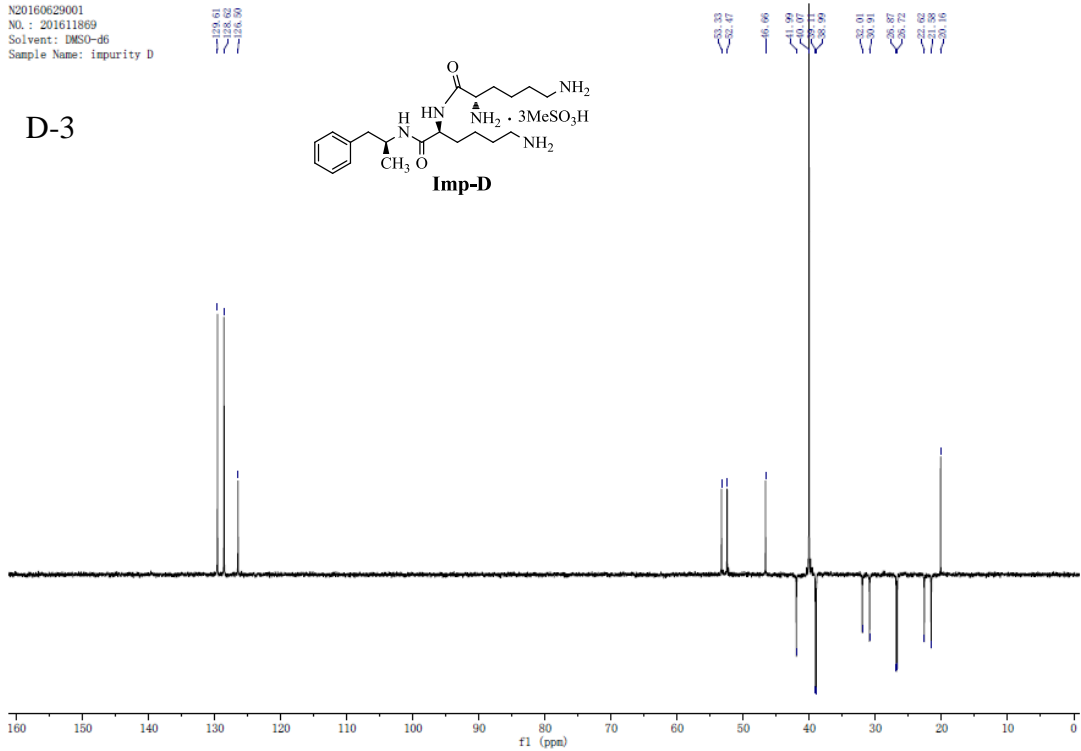

Imp-D DEPT DMSO 101 MHz

NO.: 201620622  
 Solvent: DMSO-d6  
 Sample Name: Imp-D

D-4

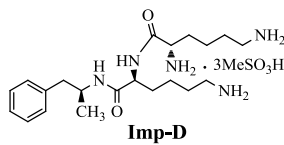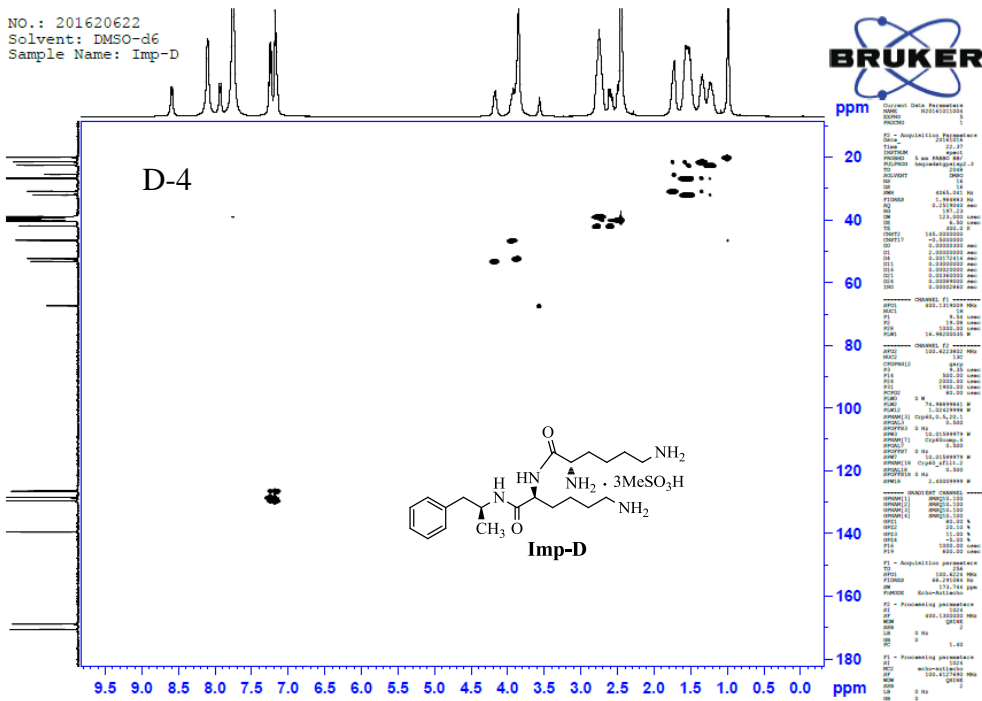

HSQC Imp-D DMSO

NO.: 201620622  
 Solvent: DMSO-d6  
 Sample Name: Imp-D

D-5

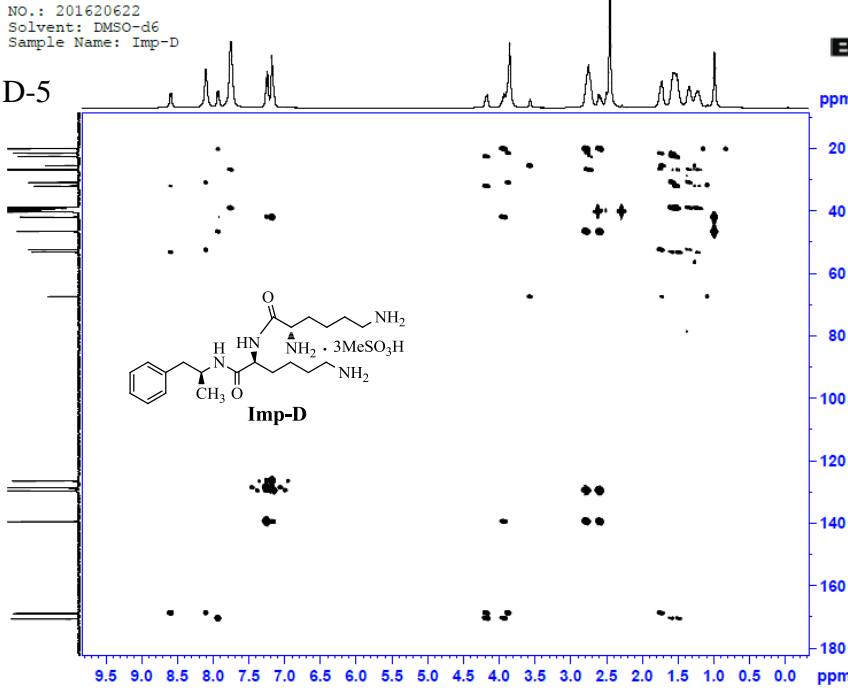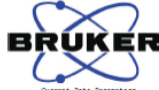

Current Data Parameters  
 Name: N01610104  
 EXPNO: 6  
 PROCNO: 1

F2 - Acquisition Parameters  
 Date\_: 20161017  
 Time: 1:14  
 INSTRUM: spect  
 PROBHD: 5 mm QNP5G 1H/13  
 PULPROG: zgpg30  
 TD: 65536  
 SOLVENT: DMSO  
 NS: 1024  
 DS: 4  
 SWH: 4062.041 MHz  
 F2RES: 0.0039380 MHz  
 AQ: 0.3038800 sec  
 RG: 197.23  
 RW: 120.000 usec  
 RE: 6.50 usec  
 DELT: 1.00  
 CHRG1: 100.000000  
 CHRG2: 140.000000  
 CHRG3: 8.000000  
 CHRG4: 0.000000  
 CHRG5: 1.500000  
 CHRG6: 0.000000  
 CHRG7: 0.000000  
 CHRG8: 0.000000  
 CHRG9: 0.000000  
 CHRG10: 0.000000  
 CHRG11: 0.000000  
 CHRG12: 0.000000  
 CHRG13: 0.000000  
 CHRG14: 0.000000  
 CHRG15: 0.000000  
 CHRG16: 0.000000  
 CHRG17: 0.000000  
 CHRG18: 0.000000  
 CHRG19: 0.000000  
 CHRG20: 0.000000  
 CHRG21: 0.000000  
 CHRG22: 0.000000  
 CHRG23: 0.000000  
 CHRG24: 0.000000  
 CHRG25: 0.000000  
 CHRG26: 0.000000  
 CHRG27: 0.000000  
 CHRG28: 0.000000  
 CHRG29: 0.000000  
 CHRG30: 0.000000  
 CHRG31: 0.000000  
 CHRG32: 0.000000  
 CHRG33: 0.000000  
 CHRG34: 0.000000  
 CHRG35: 0.000000  
 CHRG36: 0.000000  
 CHRG37: 0.000000  
 CHRG38: 0.000000  
 CHRG39: 0.000000  
 CHRG40: 0.000000  
 CHRG41: 0.000000  
 CHRG42: 0.000000  
 CHRG43: 0.000000  
 CHRG44: 0.000000  
 CHRG45: 0.000000  
 CHRG46: 0.000000  
 CHRG47: 0.000000  
 CHRG48: 0.000000  
 CHRG49: 0.000000  
 CHRG50: 0.000000  
 CHRG51: 0.000000  
 CHRG52: 0.000000  
 CHRG53: 0.000000  
 CHRG54: 0.000000  
 CHRG55: 0.000000  
 CHRG56: 0.000000  
 CHRG57: 0.000000  
 CHRG58: 0.000000  
 CHRG59: 0.000000  
 CHRG60: 0.000000  
 CHRG61: 0.000000  
 CHRG62: 0.000000  
 CHRG63: 0.000000  
 CHRG64: 0.000000  
 CHRG65: 0.000000  
 CHRG66: 0.000000  
 CHRG67: 0.000000  
 CHRG68: 0.000000  
 CHRG69: 0.000000  
 CHRG70: 0.000000  
 CHRG71: 0.000000  
 CHRG72: 0.000000  
 CHRG73: 0.000000  
 CHRG74: 0.000000  
 CHRG75: 0.000000  
 CHRG76: 0.000000  
 CHRG77: 0.000000  
 CHRG78: 0.000000  
 CHRG79: 0.000000  
 CHRG80: 0.000000  
 CHRG81: 0.000000  
 CHRG82: 0.000000  
 CHRG83: 0.000000  
 CHRG84: 0.000000  
 CHRG85: 0.000000  
 CHRG86: 0.000000  
 CHRG87: 0.000000  
 CHRG88: 0.000000  
 CHRG89: 0.000000  
 CHRG90: 0.000000  
 CHRG91: 0.000000  
 CHRG92: 0.000000  
 CHRG93: 0.000000  
 CHRG94: 0.000000  
 CHRG95: 0.000000  
 CHRG96: 0.000000  
 CHRG97: 0.000000  
 CHRG98: 0.000000  
 CHRG99: 0.000000  
 CHRG100: 0.000000

HMBC Imp-D DMSO

NO.: 201620622  
 Solvent: DMSO-d6  
 Sample Name: Imp-D

D-6

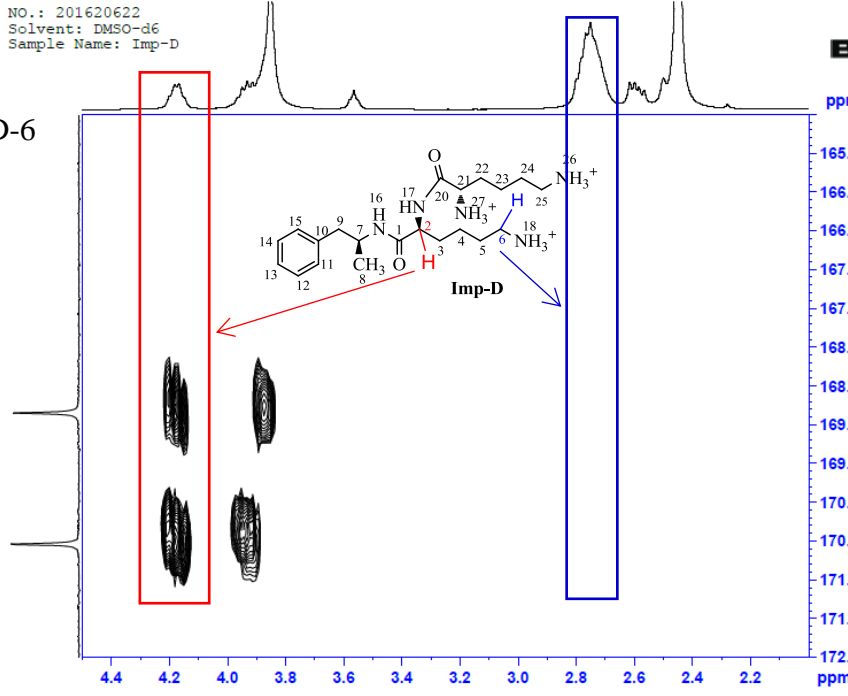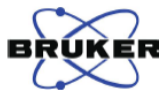

Current Data Parameters  
 Name: N01610104  
 EXPNO: 6  
 PROCNO: 1

F2 - Acquisition Parameters  
 Date\_: 20161017  
 Time: 1:14  
 INSTRUM: spect  
 PROBHD: 5 mm QNP5G 1H/13  
 PULPROG: zgpg30  
 TD: 65536  
 SOLVENT: DMSO  
 NS: 1024  
 DS: 4  
 SWH: 4062.041 MHz  
 F2RES: 0.0039380 MHz  
 AQ: 0.3038800 sec  
 RG: 197.23  
 RW: 120.000 usec  
 RE: 6.50 usec  
 DELT: 1.00  
 CHRG1: 100.000000  
 CHRG2: 140.000000  
 CHRG3: 8.000000  
 CHRG4: 0.000000  
 CHRG5: 1.500000  
 CHRG6: 0.000000  
 CHRG7: 0.000000  
 CHRG8: 0.000000  
 CHRG9: 0.000000  
 CHRG10: 0.000000  
 CHRG11: 0.000000  
 CHRG12: 0.000000  
 CHRG13: 0.000000  
 CHRG14: 0.000000  
 CHRG15: 0.000000  
 CHRG16: 0.000000  
 CHRG17: 0.000000  
 CHRG18: 0.000000  
 CHRG19: 0.000000  
 CHRG20: 0.000000  
 CHRG21: 0.000000  
 CHRG22: 0.000000  
 CHRG23: 0.000000  
 CHRG24: 0.000000  
 CHRG25: 0.000000  
 CHRG26: 0.000000  
 CHRG27: 0.000000  
 CHRG28: 0.000000  
 CHRG29: 0.000000  
 CHRG30: 0.000000  
 CHRG31: 0.000000  
 CHRG32: 0.000000  
 CHRG33: 0.000000  
 CHRG34: 0.000000  
 CHRG35: 0.000000  
 CHRG36: 0.000000  
 CHRG37: 0.000000  
 CHRG38: 0.000000  
 CHRG39: 0.000000  
 CHRG40: 0.000000  
 CHRG41: 0.000000  
 CHRG42: 0.000000  
 CHRG43: 0.000000  
 CHRG44: 0.000000  
 CHRG45: 0.000000  
 CHRG46: 0.000000  
 CHRG47: 0.000000  
 CHRG48: 0.000000  
 CHRG49: 0.000000  
 CHRG50: 0.000000  
 CHRG51: 0.000000  
 CHRG52: 0.000000  
 CHRG53: 0.000000  
 CHRG54: 0.000000  
 CHRG55: 0.000000  
 CHRG56: 0.000000  
 CHRG57: 0.000000  
 CHRG58: 0.000000  
 CHRG59: 0.000000  
 CHRG60: 0.000000  
 CHRG61: 0.000000  
 CHRG62: 0.000000  
 CHRG63: 0.000000  
 CHRG64: 0.000000  
 CHRG65: 0.000000  
 CHRG66: 0.000000  
 CHRG67: 0.000000  
 CHRG68: 0.000000  
 CHRG69: 0.000000  
 CHRG70: 0.000000  
 CHRG71: 0.000000  
 CHRG72: 0.000000  
 CHRG73: 0.000000  
 CHRG74: 0.000000  
 CHRG75: 0.000000  
 CHRG76: 0.000000  
 CHRG77: 0.000000  
 CHRG78: 0.000000  
 CHRG79: 0.000000  
 CHRG80: 0.000000  
 CHRG81: 0.000000  
 CHRG82: 0.000000  
 CHRG83: 0.000000  
 CHRG84: 0.000000  
 CHRG85: 0.000000  
 CHRG86: 0.000000  
 CHRG87: 0.000000  
 CHRG88: 0.000000  
 CHRG89: 0.000000  
 CHRG90: 0.000000  
 CHRG91: 0.000000  
 CHRG92: 0.000000  
 CHRG93: 0.000000  
 CHRG94: 0.000000  
 CHRG95: 0.000000  
 CHRG96: 0.000000  
 CHRG97: 0.000000  
 CHRG98: 0.000000  
 CHRG99: 0.000000  
 CHRG100: 0.000000

The the enlarged view of the HMBC spectrum of Imp-D



20160712001  
O.: 201620197  
olvent: DMSO-d6  
sample Name: impurity E

E-1

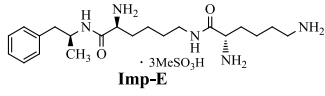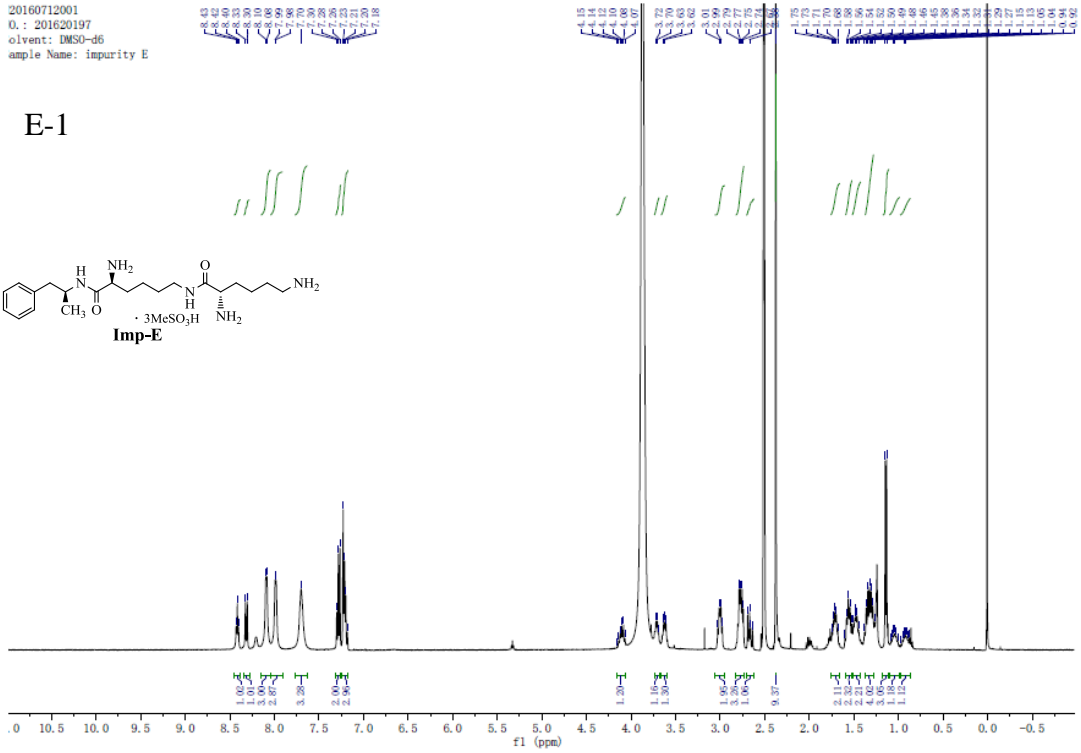

Imp-E <sup>1</sup>H NMR DMSO 400 MHz

N20160712001  
NO.: 201620197  
Solvent: DMSO-d6  
Sample Name: impurity E

E-2

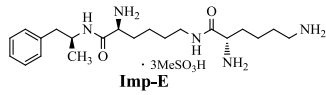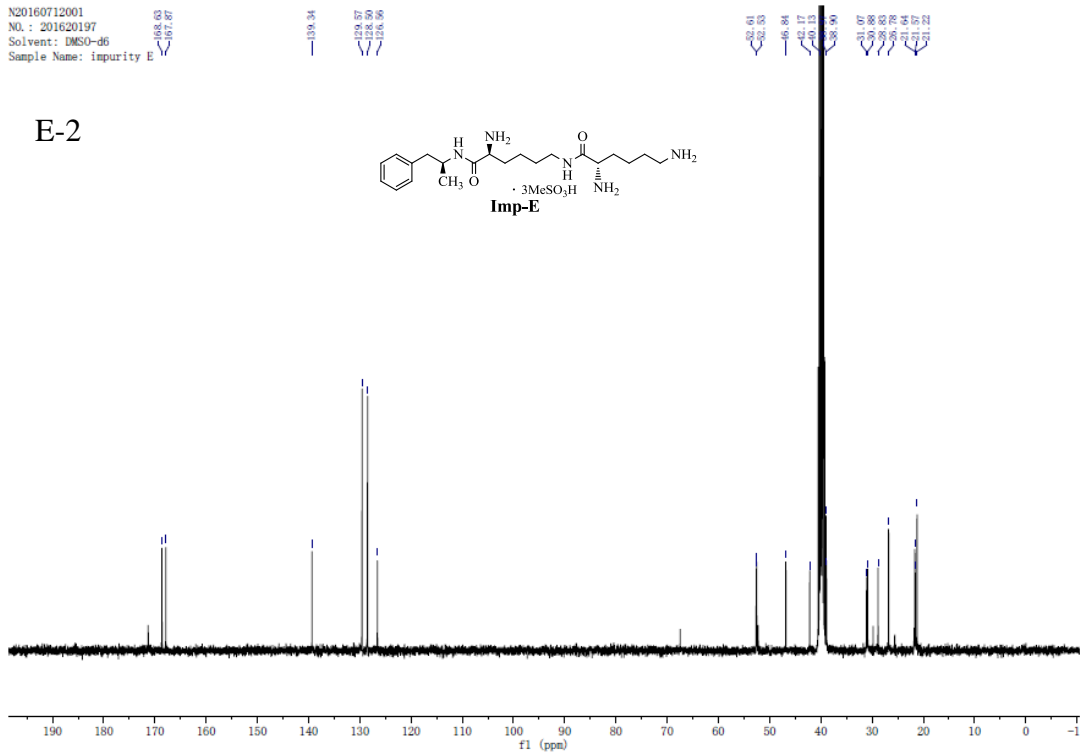

Imp-E <sup>13</sup>C NMR DMSO 101 MHz

N20160712001  
 NO.: 201620197  
 Solvent: DMSO-d6  
 Sample Name: impurity E

129.55  
 129.55  
 129.55  
 129.55

65.15  
 65.15  
 65.15  
 65.15  
 46.86  
 46.86  
 46.86  
 46.86  
 31.77  
 31.77  
 31.77  
 31.77  
 20.91  
 20.91  
 20.91  
 20.91

E-3

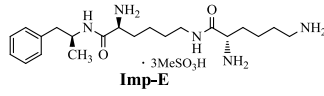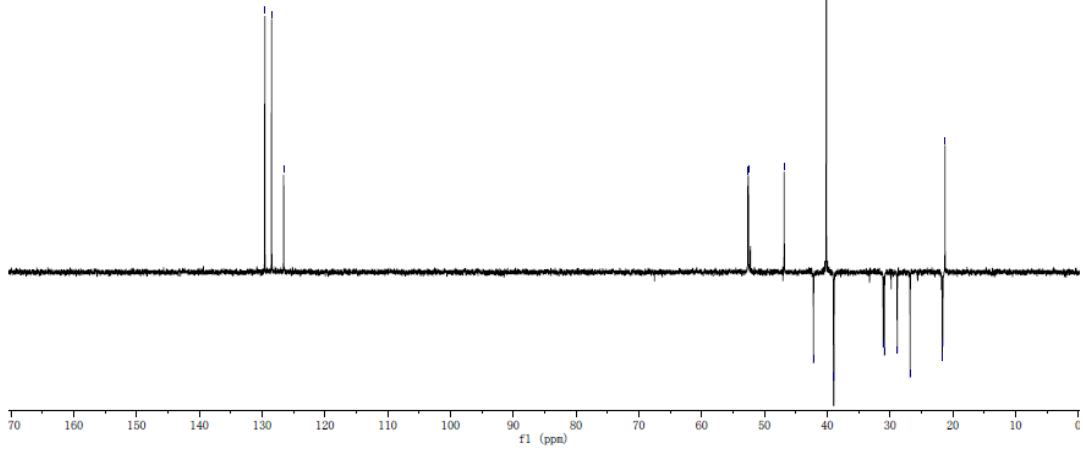

Imp-E DEPT DMSO 101 MHz

No.: 201620621  
 Solvent: DMSO-d6  
 Sample Name: Imp-E

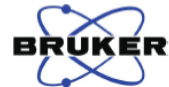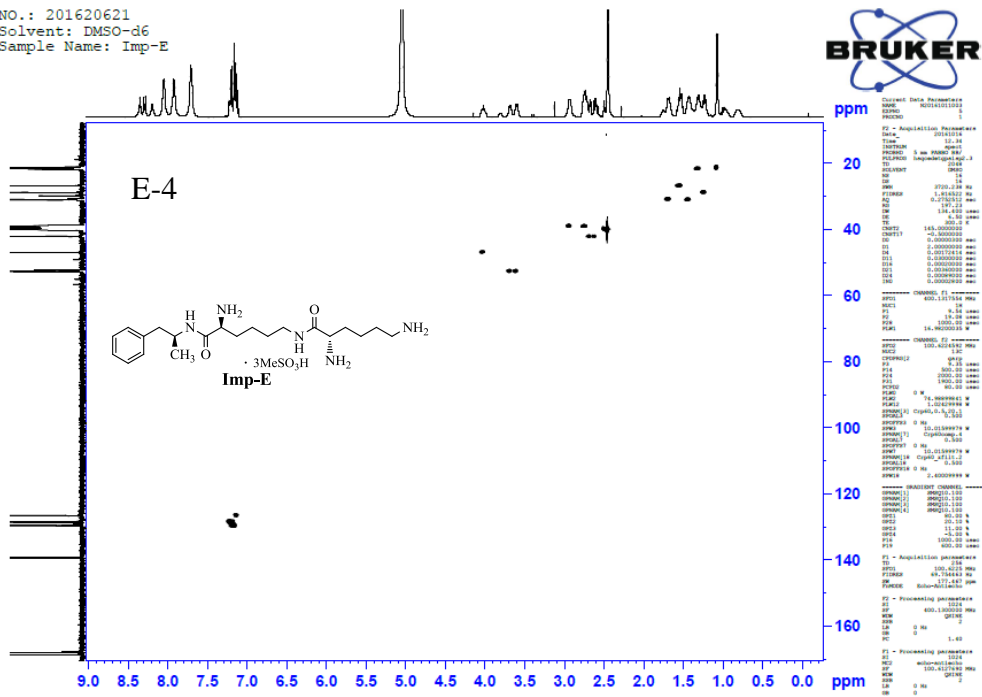

HSQC Imp-E DMSO

NO.: 201620621  
 Solvent: DMSO-d6  
 Sample Name: Imp-E

E-5

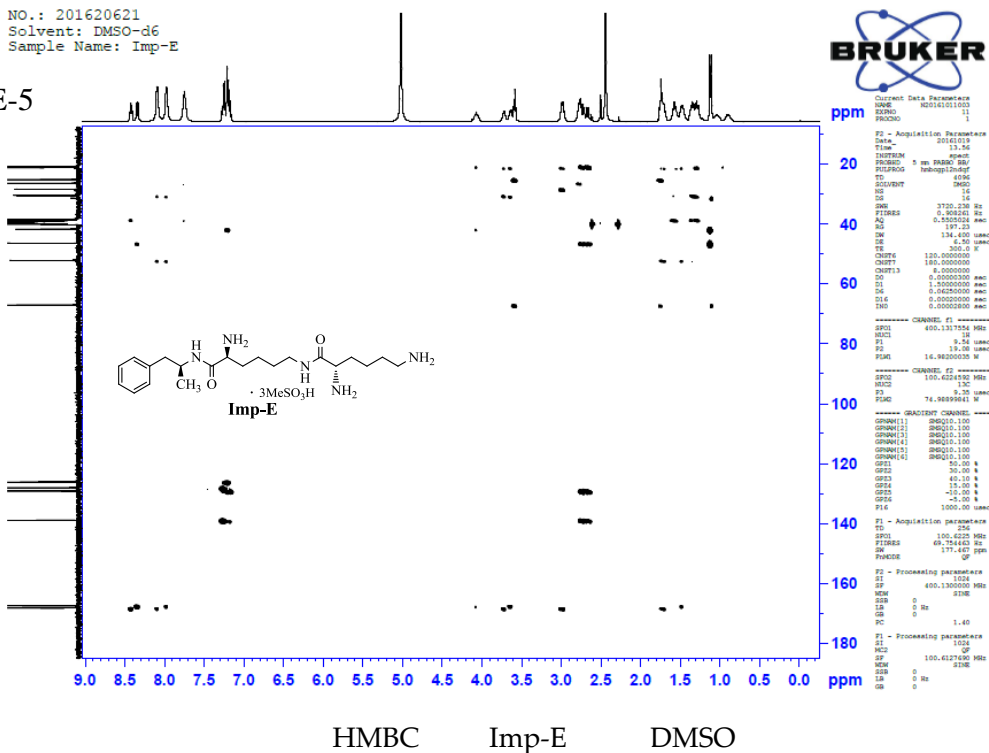

HMBC Imp-E DMSO

NO.: 201620621  
 Solvent: DMSO-d6  
 Sample Name: Imp-E

E-6

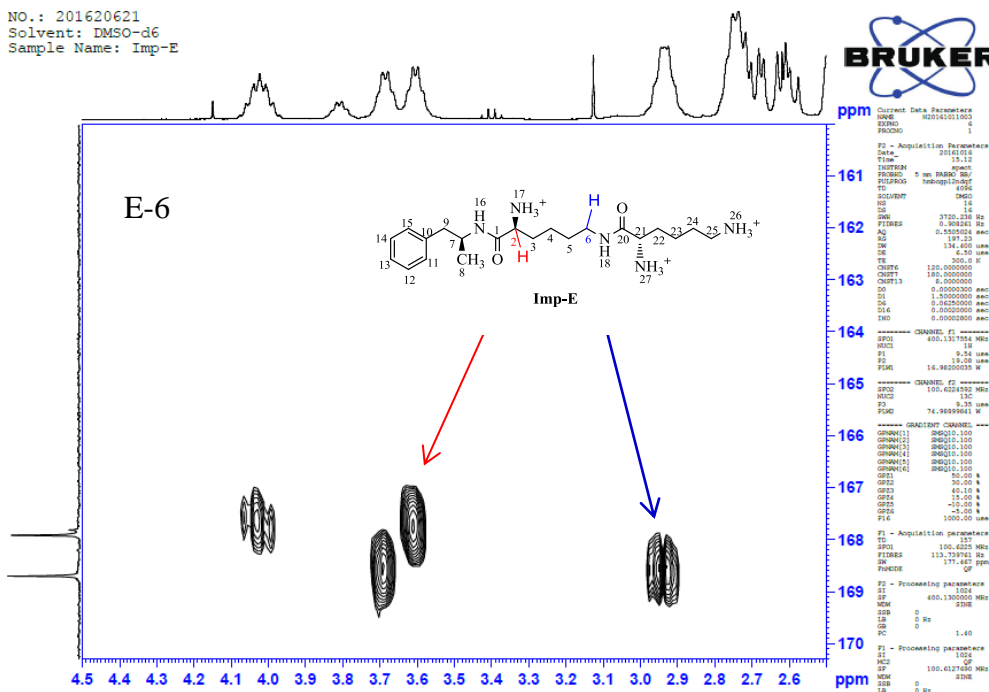

The the enlarged view of the HMBC spectrum of Imp-E



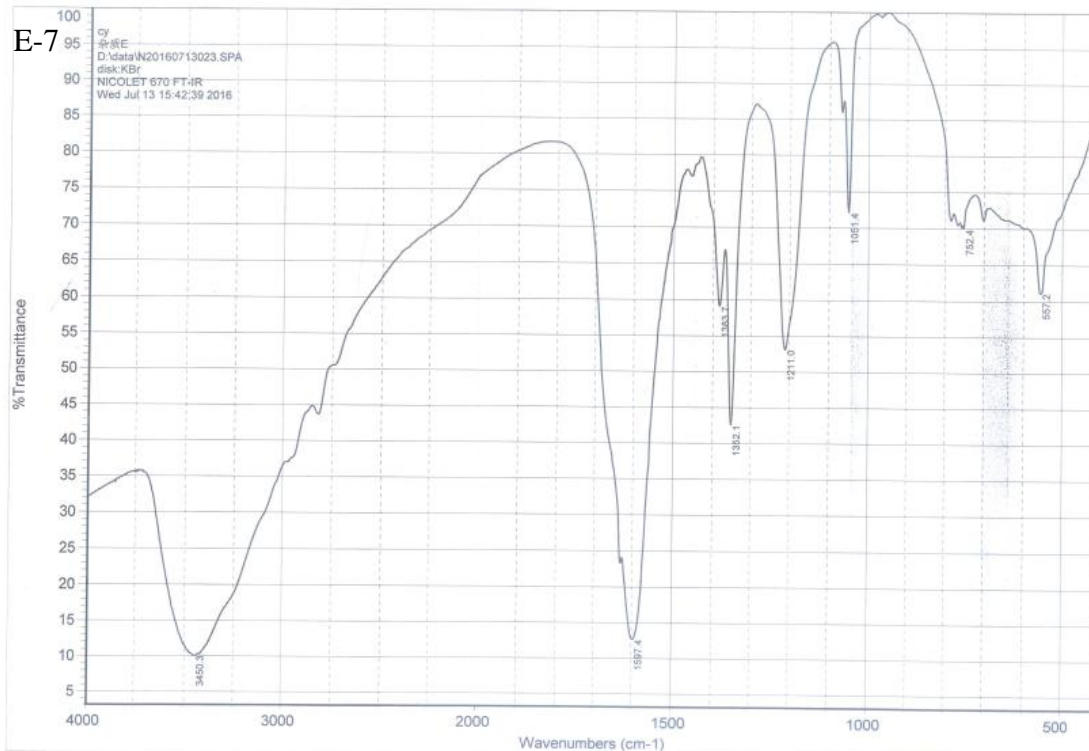

Imp-E IR

E-8

### Qualitative Compound Report

|                 |                |                        |              |
|-----------------|----------------|------------------------|--------------|
| Data File       | 20160630-019.d | Sample Name            | Impurity E   |
| Sample Type     | Sample         | Position               | Vial 51      |
| Instrument Name | Instrument 1   | User Name              |              |
| Acq Method      |                | IRM Calibration Status | Success      |
| DA Method       | MS.m           | Comment                | N20160627019 |

#### Compound Table

| Compound Label       | RT    | Mass     | Abund | Formula       | Tgt Mass | Diff (ppm) |
|----------------------|-------|----------|-------|---------------|----------|------------|
| Cpd 1: C21 H37 N5 O2 | -0.05 | 391.2954 | 66624 | C21 H37 N5 O2 | 391.2947 | 1.66       |

| Compound Label       | RT    | Algorithm       | Mass     |
|----------------------|-------|-----------------|----------|
| Cpd 1: C21 H37 N5 O2 | -0.05 | Find By Formula | 391.2954 |

#### MS Zoomed Spectrum

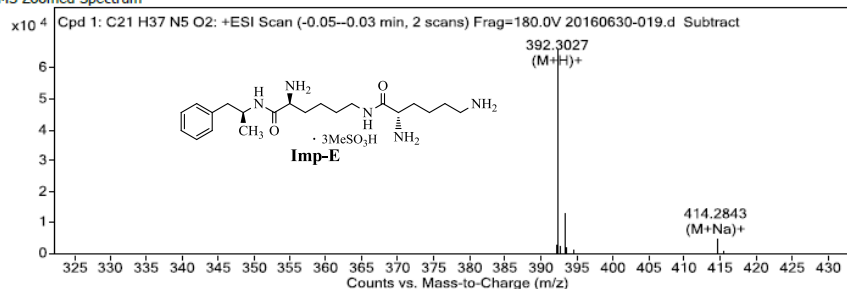

#### MS Spectrum Peak List

| m/z      | Calc m/z | Diff(ppm) | z | Abund | Formula          | Ion     |
|----------|----------|-----------|---|-------|------------------|---------|
| 392.3027 | 392.302  | 1.66      | 1 | 66624 | C21 H38 N5 O2    | (M+H)+  |
| 414.2843 | 414.2839 | 0.82      | 1 | 4866  | C21 H37 N5 Na O2 | (M+Na)+ |

Imp-E HRMS

N20160622002  
 NO : 201611802  
 Solvent: CDCl3+D2O  
 Sample Name: impurity F

F-1

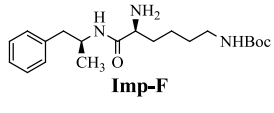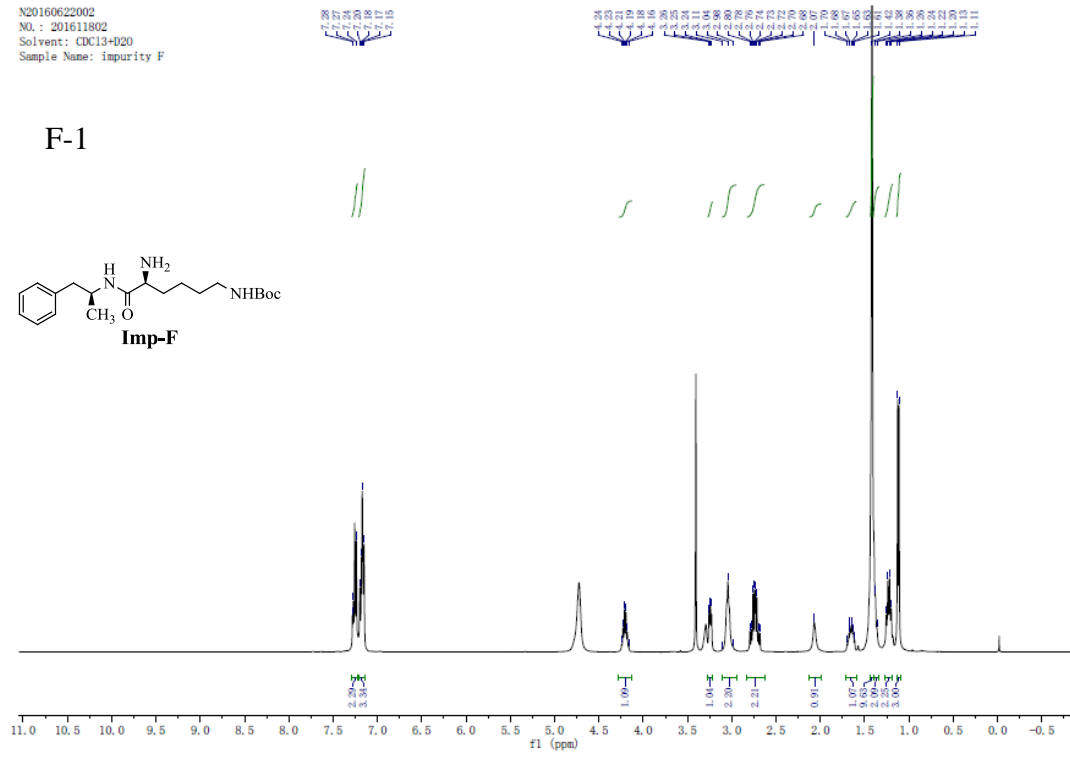

Imp-F <sup>1</sup>H NMR CDCl<sub>3</sub> 400 MHz

N20160622002  
 NO : 201611802  
 Solvent: CDCl3  
 Sample Name: impurity F

F-2

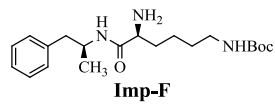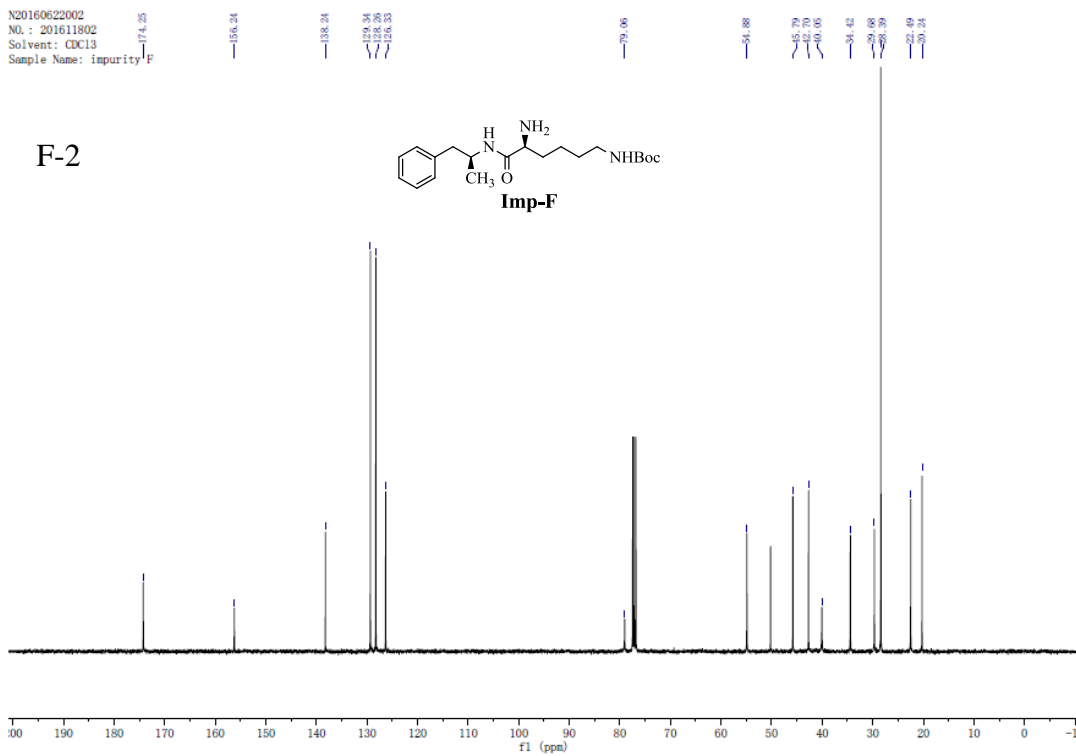

Imp-F <sup>13</sup>C NMR CDCl<sub>3</sub> 101 MHz

N20160711004  
NO.: 201612017  
Solvent: DMSO-d6  
Sample Name: impurity F

129.82  
128.62  
128.16  
127.45

54.96  
-0.01  
-0.29  
-0.25  
-0.00  
-0.89  
-0.74  
-2.88  
-20.54

F-3

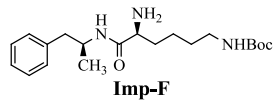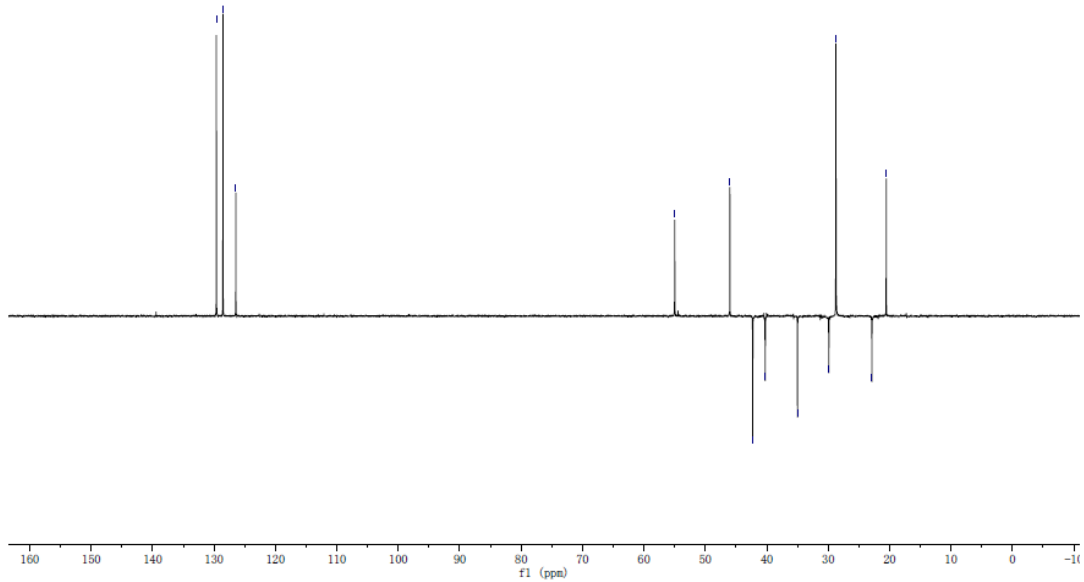

Imp-F DEPT CDCl<sub>3</sub> 101 MHz

F-4

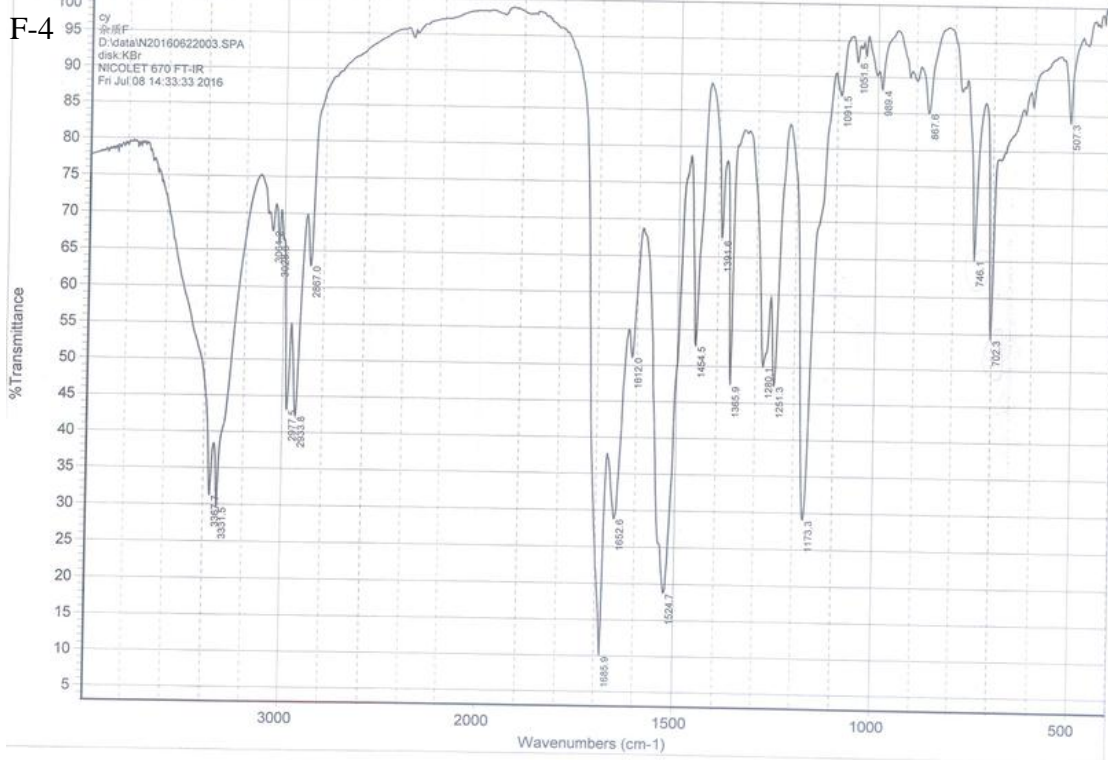

Imp-F IR

## Qualitative Compound Report

|                 |                |                        |              |
|-----------------|----------------|------------------------|--------------|
| Data File       | 20160701-003.d | Sample Name            | Impurity F   |
| Sample Type     | Sample         | Position               | Vial 53      |
| Instrument Name | Instrument 1   | User Name              |              |
| Acq Method      |                | IRM Calibration Status | Success      |
| DA Method       | MS.m           | Comment                | N20160622003 |

## Compound Table

| Compound Label       | RT    | Mass     | Abund  | Formula       | Tgt Mass | Diff (ppm) |
|----------------------|-------|----------|--------|---------------|----------|------------|
| Cpd 1: C20 H33 N3 O3 | -0.25 | 363.2522 | 324479 | C20 H33 N3 O3 | 363.2522 | -0.03      |

| Compound Label       | RT    | Algorithm       | Mass     |
|----------------------|-------|-----------------|----------|
| Cpd 1: C20 H33 N3 O3 | -0.25 | Find By Formula | 363.2522 |

## MS Zoomed Spectrum

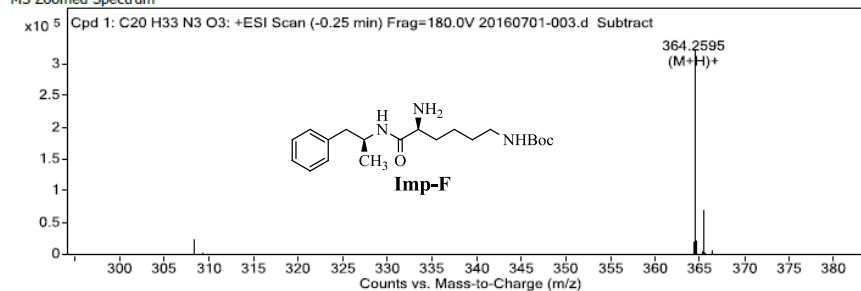

## MS Spectrum Peak List

| m/z      | Calc m/z | Diff(ppm) | Abund  | Formula       | Ion                |
|----------|----------|-----------|--------|---------------|--------------------|
| 364.2595 | 364.2595 | -0.01     | 324479 | C20 H34 N3 O3 | (M+H) <sup>+</sup> |

## Imp-F HRMS

N20160615001  
NO: 201611728  
Solvent: CDCl<sub>3</sub>+D2O  
Sample Name: Impurity G

## G-1

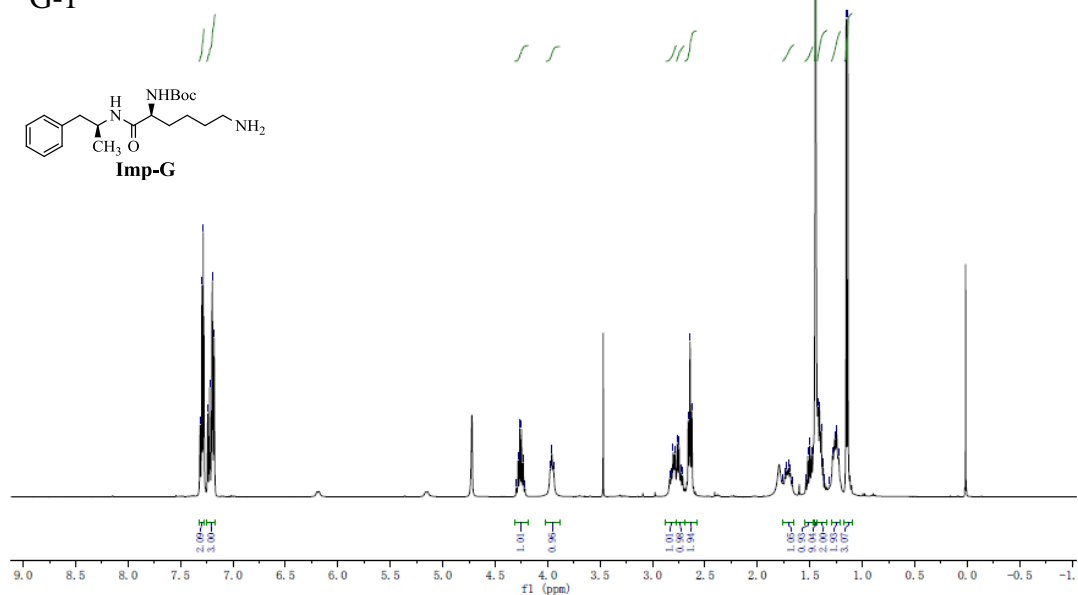

N20160602021  
NO.: 201620081  
Solvent: CDCl3  
Sample Name: impurity-G

G-2

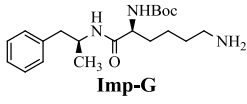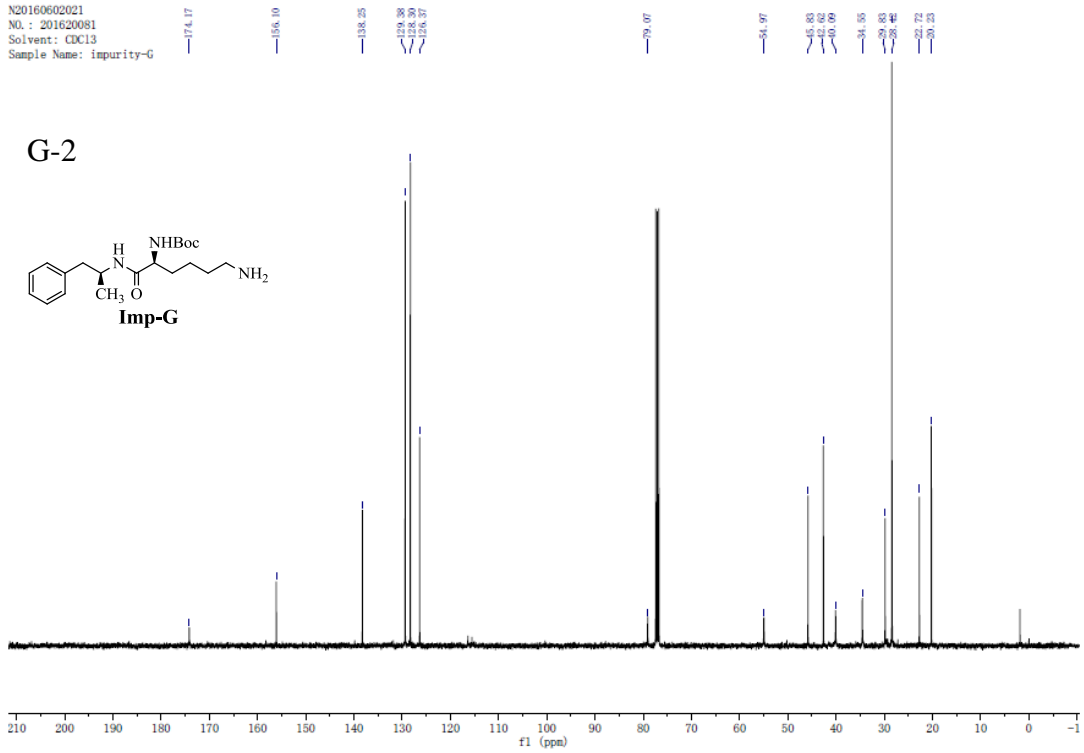

Imp-G  $^{13}\text{C}$  NMR CDCl<sub>3</sub> 101 MHz

N20160630029  
NO.: 201611901  
Solvent: CDCl3  
Sample Name: impurity G

G-3

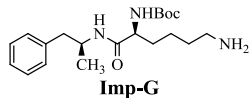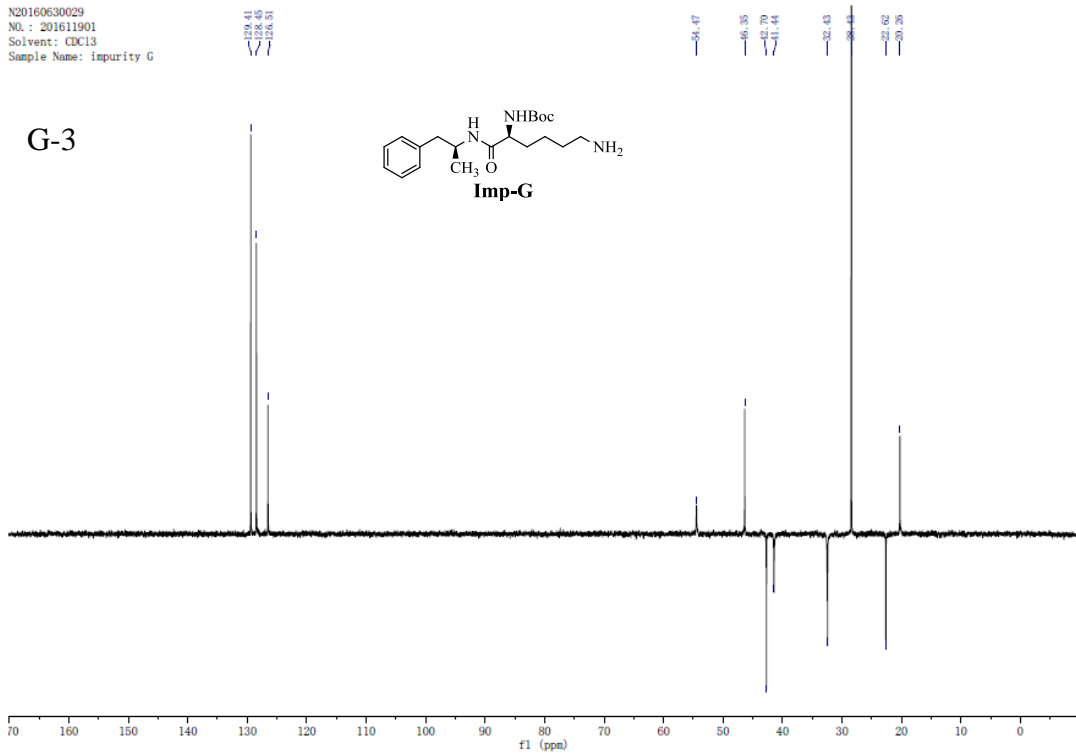

Imp-G DEPT CDCl<sub>3</sub> 101 MHz

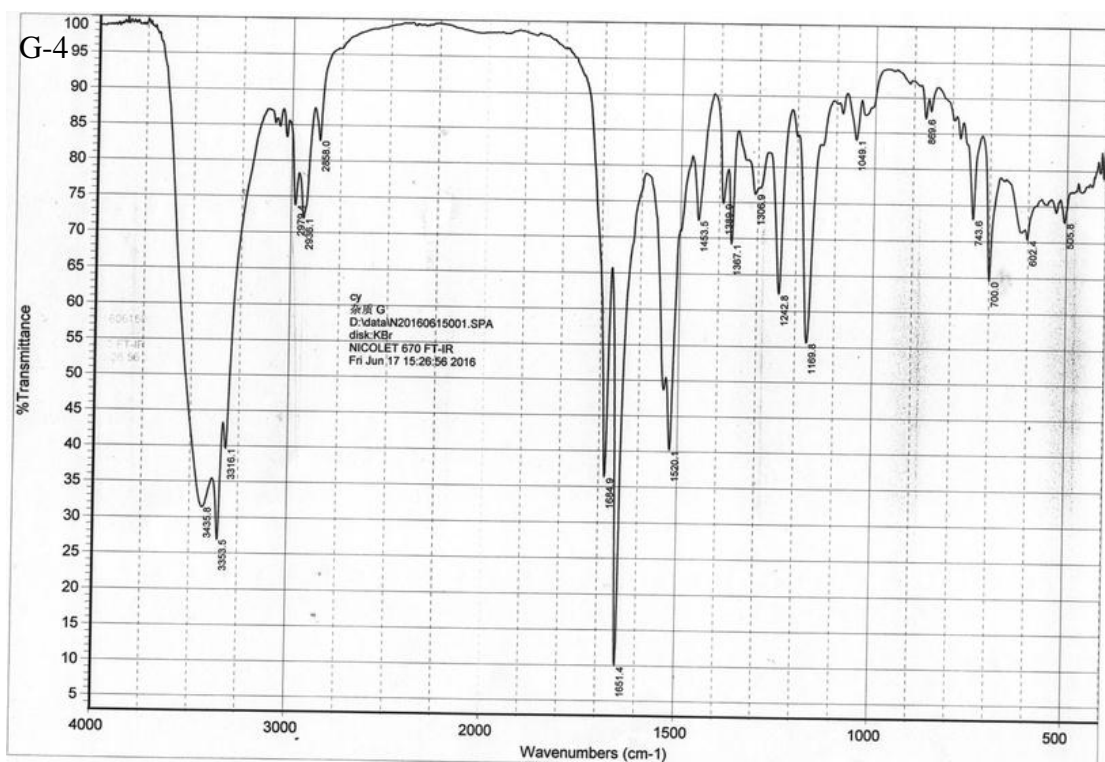

Imp-G IR

G-5

### Qualitative Compound Report

|                 |                |                        |              |
|-----------------|----------------|------------------------|--------------|
| Data File       | 20160701-006.d | Sample Name            | Impurity G   |
| Sample Type     | Sample         | Position               | Vial 55      |
| Instrument Name | Instrument 1   | User Name              |              |
| Acq Method      |                | IRM Calibration Status | Success      |
| DA Method       | MS.m           | Comment                | N20160615001 |

#### Compound Table

| Compound Label       | RT   | Mass     | Abund  | Formula       | Tgt Mass | Diff (ppm) |
|----------------------|------|----------|--------|---------------|----------|------------|
| Cpd 1: C20 H33 N3 O3 | 0.06 | 363.2517 | 165528 | C20 H33 N3 O3 | 363.2522 | -1.27      |

| Compound Label       | RT   | Algorithm       | Mass     |
|----------------------|------|-----------------|----------|
| Cpd 1: C20 H33 N3 O3 | 0.06 | Find By Formula | 363.2517 |

#### MS Zoomed Spectrum

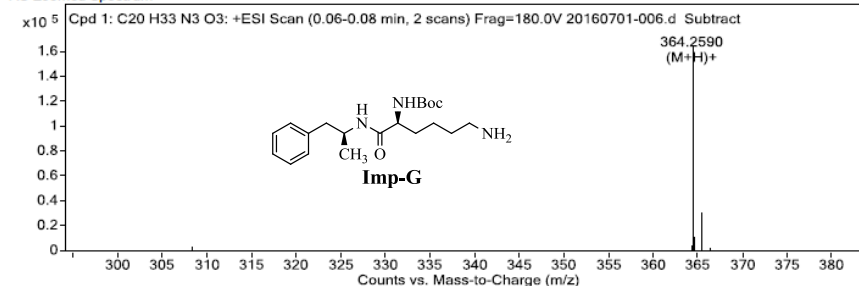

#### MS Spectrum Peak List

| m/z     | Calc m/z | Diff(ppm) | Abund  | Formula       | Ion    |
|---------|----------|-----------|--------|---------------|--------|
| 364.259 | 364.2595 | -1.27     | 165528 | C20 H34 N3 O3 | (M+H)+ |

Imp-G HRMS







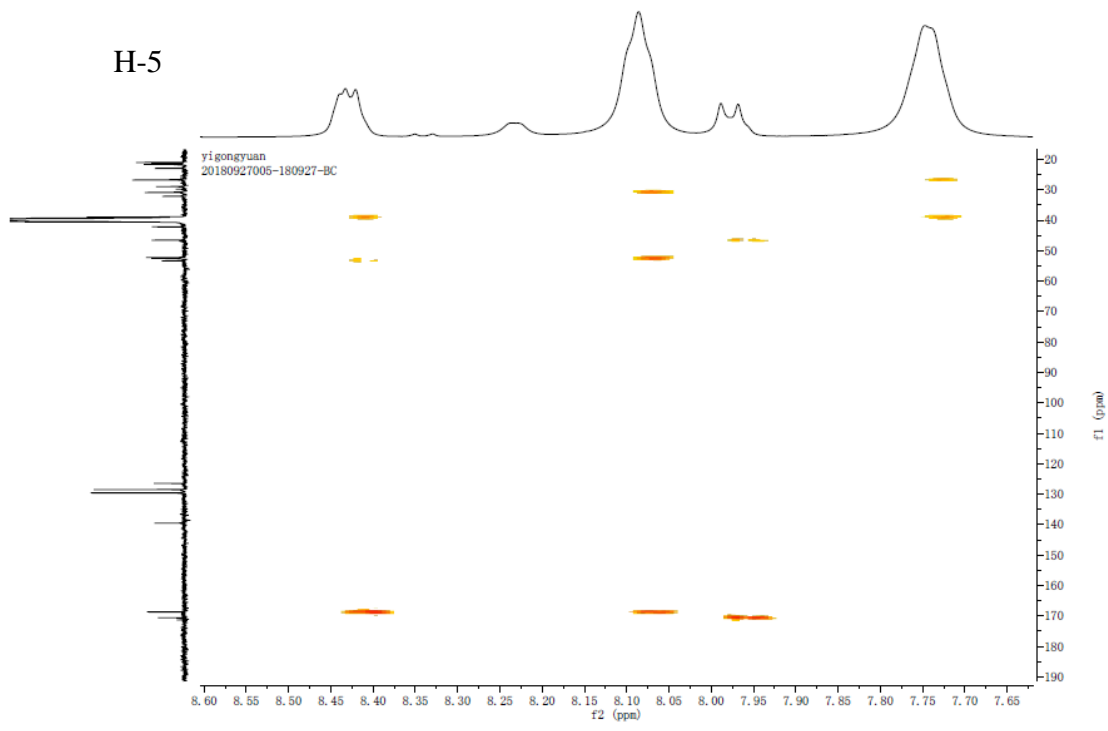

Imp-H the enlarged view of HMBC DMSO

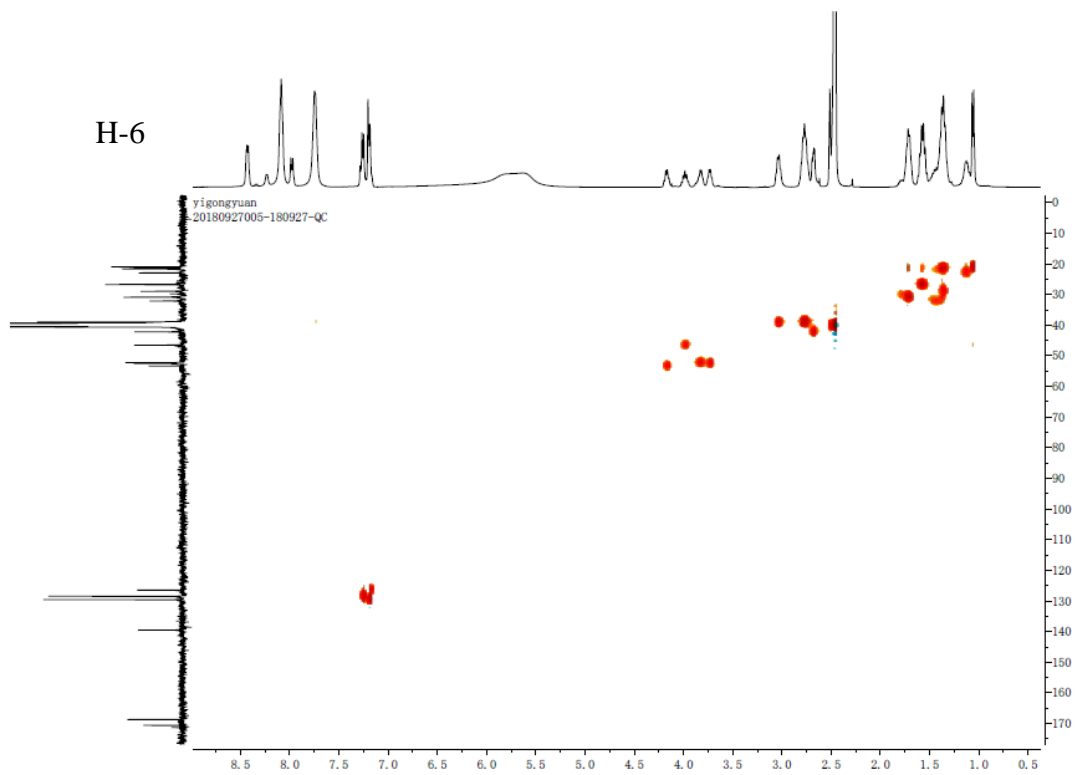

Imp-H HSQC DMSO

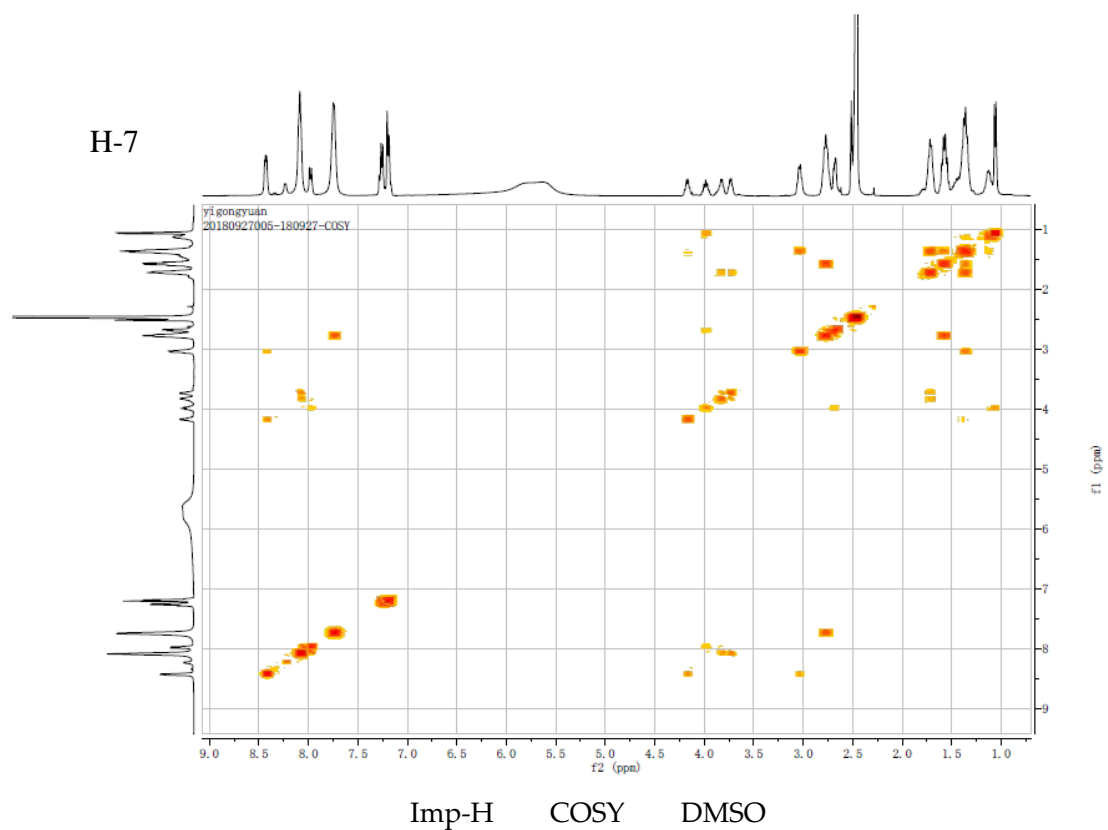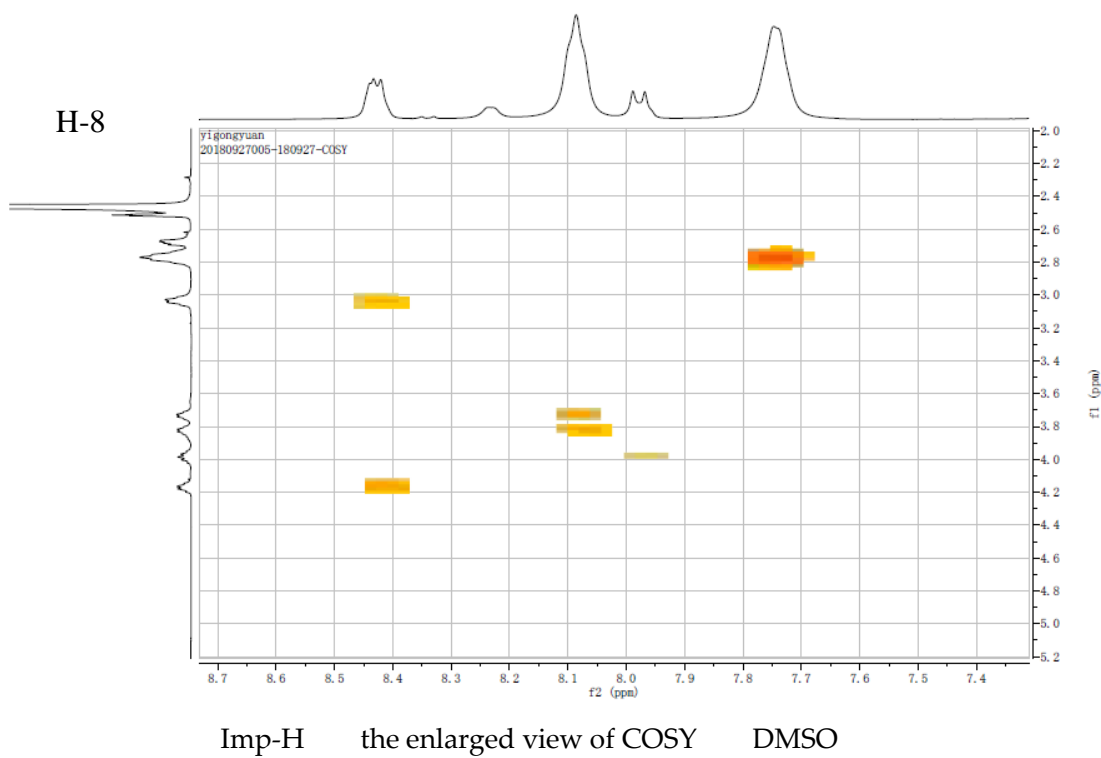

H-9

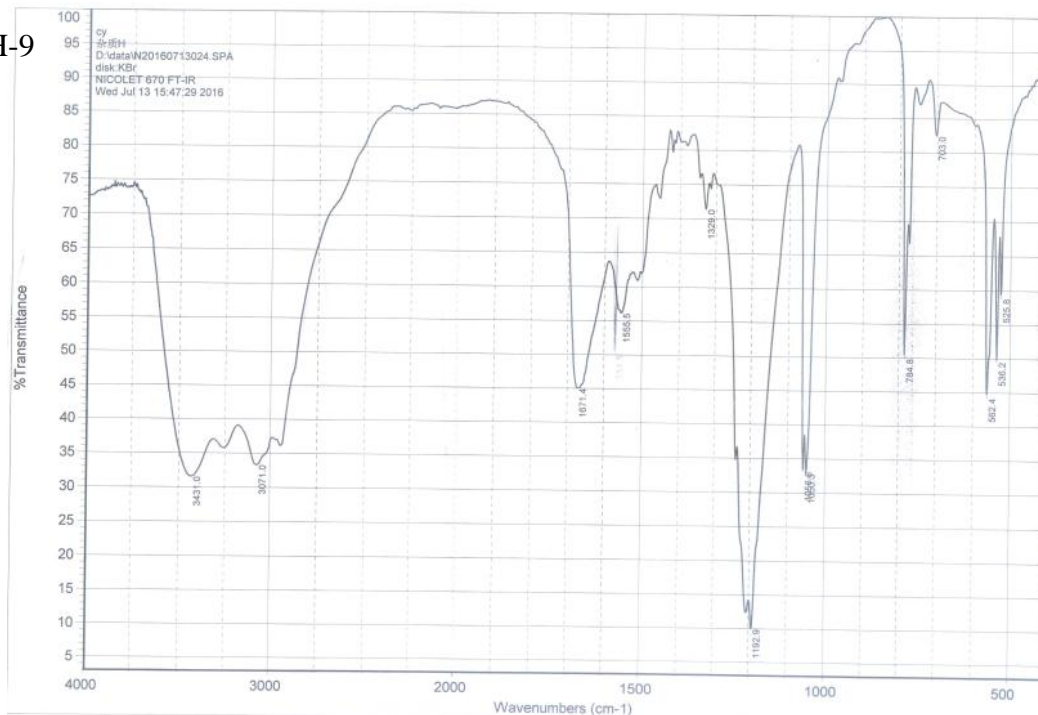

Imp-H IR

H-10

### Qualitative Compound Report

|                 |                |                        |              |
|-----------------|----------------|------------------------|--------------|
| Data File       | 20160701-008.d | Sample Name            | Impurity H   |
| Sample Type     | Sample         | Position               | Vial 57      |
| Instrument Name | Instrument 1   | User Name              |              |
| Acq Method      |                | IRM Calibration Status | Success      |
| DA Method       | MS.m           | Comment                | N20160622004 |

#### Compound Table

| Compound Label       | RT    | Mass     | Abund | Formula       | Tgt Mass | Diff (ppm) |
|----------------------|-------|----------|-------|---------------|----------|------------|
| Cpd 1: C27 H49 N7 O3 | -0.26 | 519.3903 | 91317 | C27 H49 N7 O3 | 519.3897 | 1.13       |

| Compound Label       | RT    | Algorithm       | Mass     |
|----------------------|-------|-----------------|----------|
| Cpd 1: C27 H49 N7 O3 | -0.26 | Find By Formula | 519.3903 |

#### MS Zoomed Spectrum

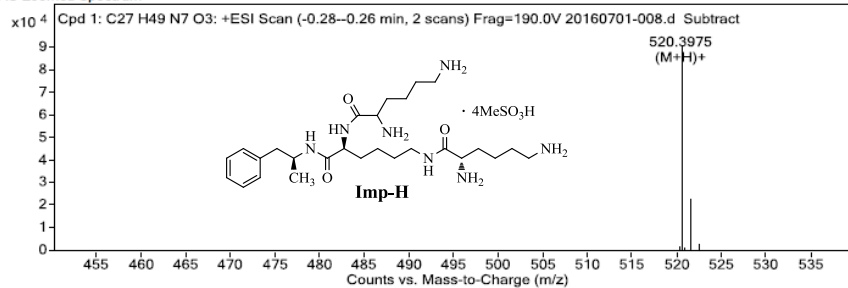

#### MS Spectrum Peak List

| m/z      | Calc m/z | Diff(ppm) | z | Abund | Formula       | Ion    |
|----------|----------|-----------|---|-------|---------------|--------|
| 520.3975 | 520.397  | 1.12      | 1 | 91317 | C27 H50 N7 O3 | (M+H)+ |

Imp-H HRMS

20180416063  
NO.: 20180416063  
Solvent: CDCl3  
Sample Name: 5-20170912

J-1

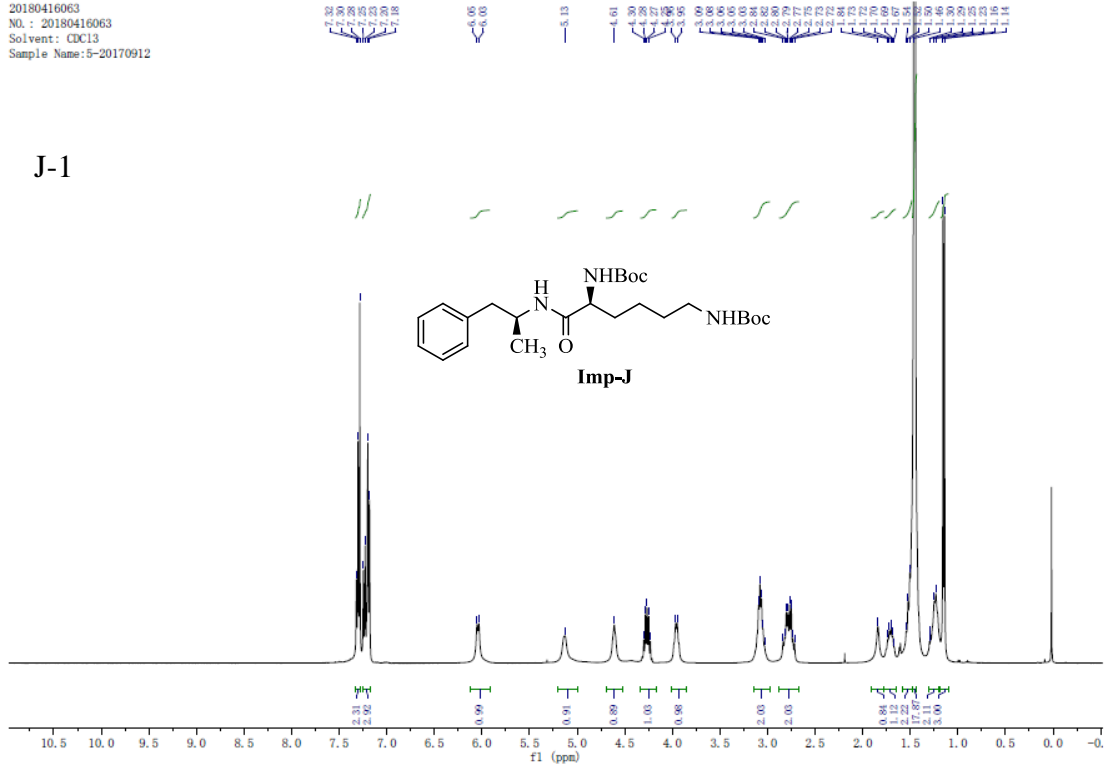

Imp-J <sup>1</sup>H NMR CDCl<sub>3</sub> 400 MHz

20180416063  
NO.: 20180416063  
Solvent: CDCl3  
Sample Name: 5-20170912

J-2

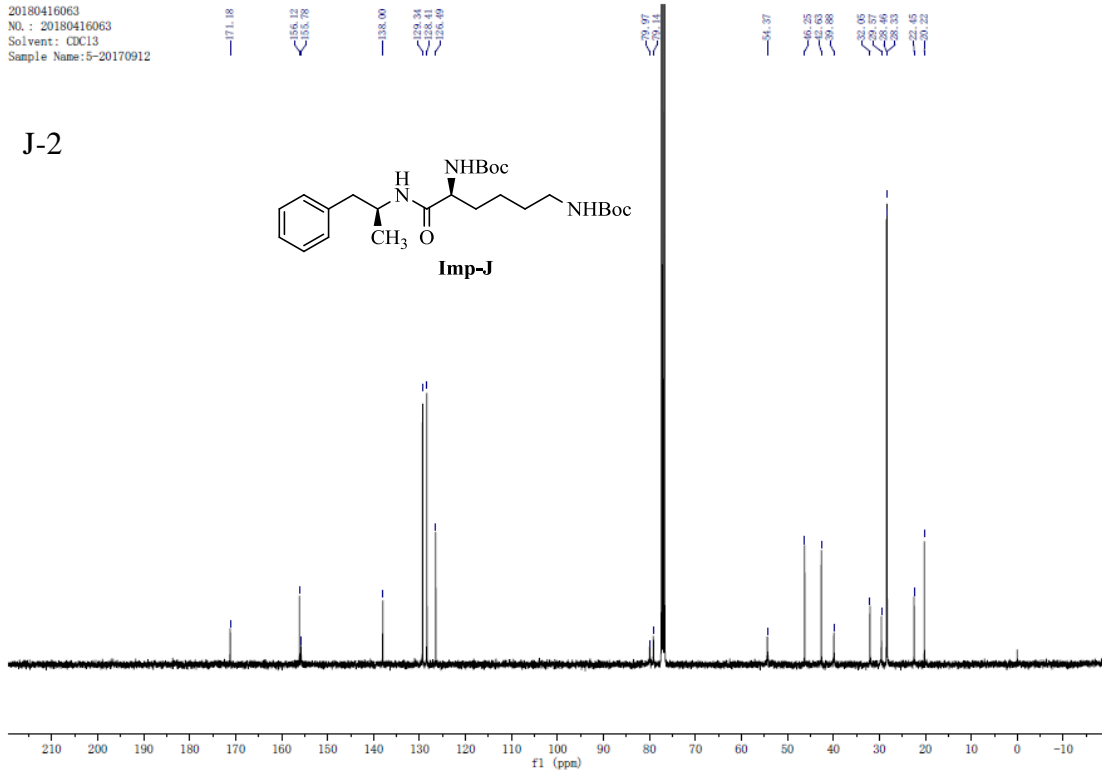

Imp-J <sup>13</sup>C NMR CDCl<sub>3</sub> 101 MHz

20180416063  
 NO.: 20180416063  
 Solvent: CDCl3  
 Sample Name: 5-20170912

129.34  
 128.41  
 128.49

51.38  
 46.25  
 42.03  
 39.88  
 32.05  
 31.96  
 31.86  
 22.45  
 20.23

J-3

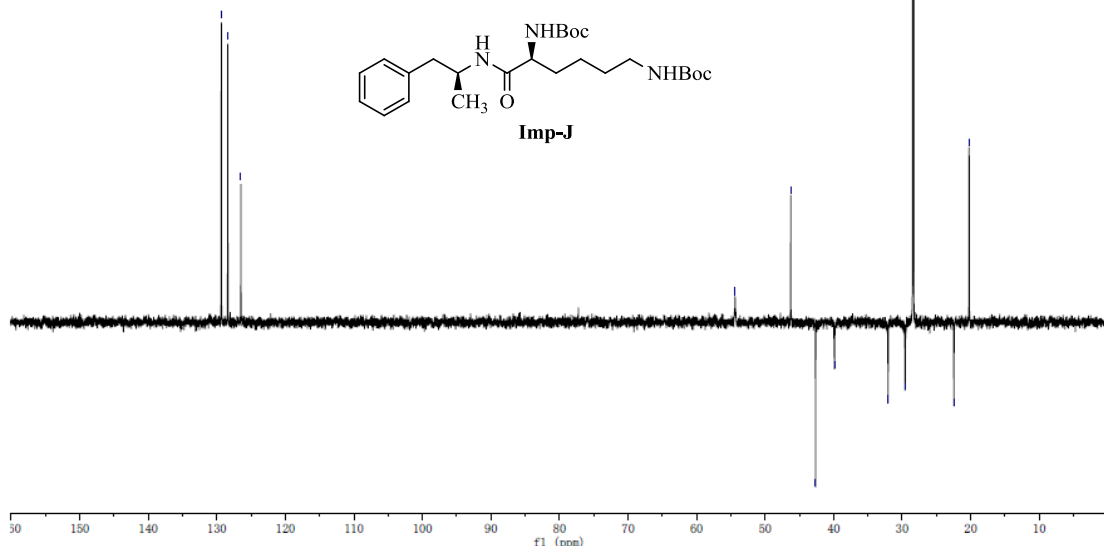

Imp-J DEPT CDCl<sub>3</sub> 101 MHz

J-4

## Qualitative Compound Report

|                 |                |                        |              |
|-----------------|----------------|------------------------|--------------|
| Data File       | 20160817-015.d | Sample Name            | LYBBA-5      |
| Sample Type     | Sample         | Position               | Vial 14      |
| Instrument Name | Instrument 1   | User Name              |              |
| Acq Method      |                | IRM Calibration Status | Success      |
| DA Method       | MS.m           | Comment                | N20160816003 |

### Compound Table

| Compound Label                                                       | RT    | Mass     | Abund | Formula                                                       | Tgt Mass | Diff (ppm) |
|----------------------------------------------------------------------|-------|----------|-------|---------------------------------------------------------------|----------|------------|
| Cpd 1: C <sub>25</sub> H <sub>41</sub> N <sub>3</sub> O <sub>5</sub> | -0.04 | 463.3048 | 71303 | C <sub>25</sub> H <sub>41</sub> N <sub>3</sub> O <sub>5</sub> | 463.3046 | 0.44       |

| Compound Label                                                       | RT    | Algorithm       | Mass     |
|----------------------------------------------------------------------|-------|-----------------|----------|
| Cpd 1: C <sub>25</sub> H <sub>41</sub> N <sub>3</sub> O <sub>5</sub> | -0.04 | Find By Formula | 463.3048 |

### MS Zoomed Spectrum

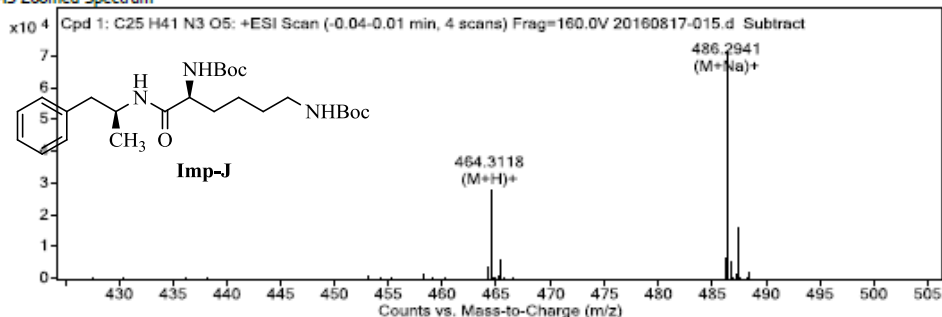

### MS Spectrum Peak List

| m/z      | Calc m/z | Diff (ppm) | z | Abund | Formula                                                          | Ion     |
|----------|----------|------------|---|-------|------------------------------------------------------------------|---------|
| 464.3118 | 464.3119 | -0.3       | 1 | 28188 | C <sub>25</sub> H <sub>42</sub> N <sub>3</sub> O <sub>5</sub>    | (M+H)+  |
| 486.2941 | 486.2938 | 0.48       |   | 71303 | C <sub>25</sub> H <sub>41</sub> N <sub>3</sub> Na O <sub>5</sub> | (M+Na)+ |

--- End Of Report ---

Imp-J HRMS



## Qualitative Compound Report

|                 |                |                        |              |
|-----------------|----------------|------------------------|--------------|
| Data File       | 20160706-003.d | Sample Name            | Impurity-K   |
| Sample Type     | Sample         | Position               | Vial 77      |
| Instrument Name | Instrument 1   | User Name              |              |
| Acq Method      |                | IRM Calibration Status | Success      |
| DA Method       | MS.m           | Comment                | N20160706004 |

## Compound Table

| Compound Label     | RT   | Mass     | Abund  | Formula     | Tgt Mass | Diff (ppm) |
|--------------------|------|----------|--------|-------------|----------|------------|
| Cpd 1: C10 H13 N O | 0.14 | 163.0996 | 128172 | C10 H13 N O | 163.0997 | -0.88      |

| Compound Label     | RT   | Algorithm       | Mass     |
|--------------------|------|-----------------|----------|
| Cpd 1: C10 H13 N O | 0.14 | Find By Formula | 163.0996 |

## MS Zoomed Spectrum

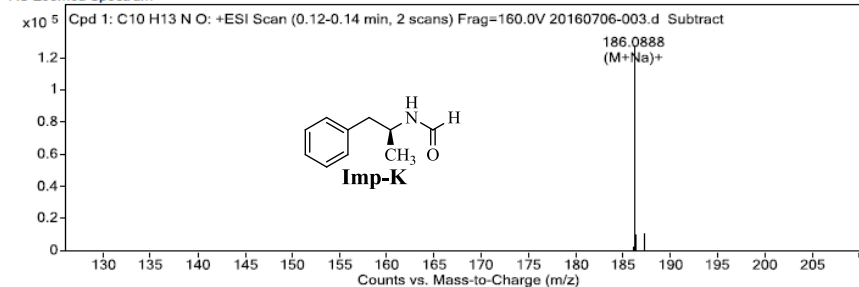

## MS Spectrum Peak List

| m/z      | Calc m/z | Diff(ppm) | z | Abund  | Formula        | Ion     |
|----------|----------|-----------|---|--------|----------------|---------|
| 186.0888 | 186.0889 | -0.77     | 1 | 128172 | C10 H13 N Na O | (M+Na)+ |

--- End Of Report ---

## Imp-K HRMS

N20160620003  
 NO : 201611775  
 Solvent: DMSO-d6+D2O  
 Sample Name: impurity L

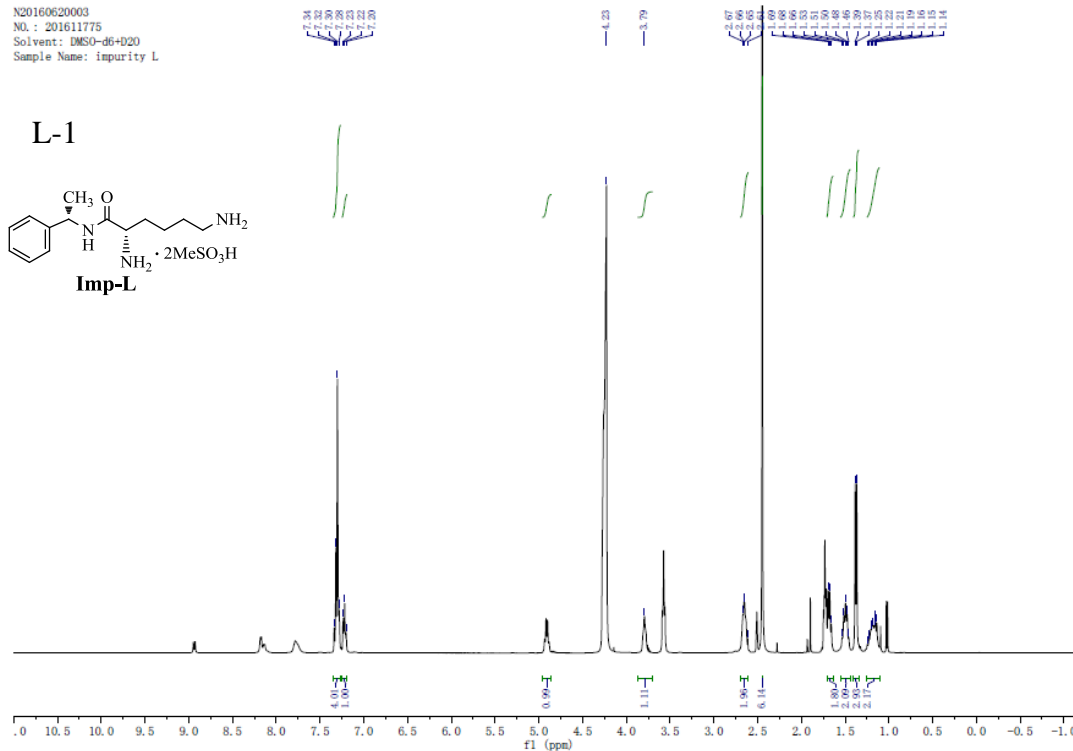Imp-L <sup>1</sup>H NMR DMSO 400 MHz

N20160620003  
NO.: 201611775  
Solvent: DMSO-d6  
Sample Name: impurity L

167.95

144.61

138.78  
137.82  
136.37

52.33  
48.91

40.11  
39.25

28.95  
28.05  
27.14  
26.24

L-2

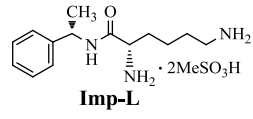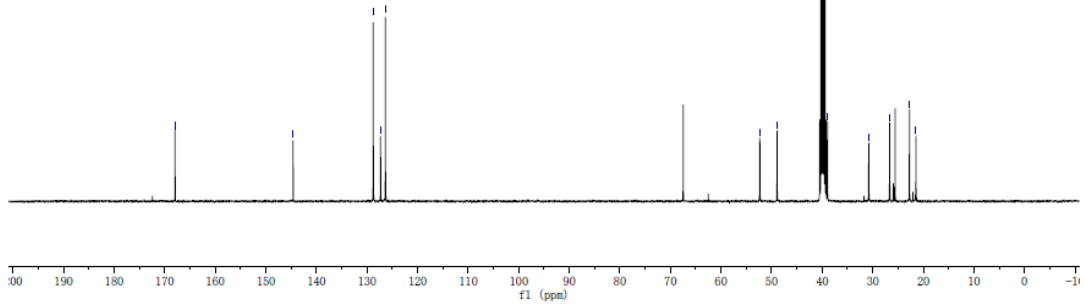

Imp-L <sup>13</sup>C NMR DMSO 101 MHz

N20160711005  
NO.: 201612018  
Solvent: DMSO-d6  
Sample Name: impurity L

138.78  
137.82  
136.37

52.33  
48.91

40.11  
39.25

28.95  
28.05  
27.14  
26.24

L-3

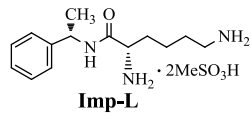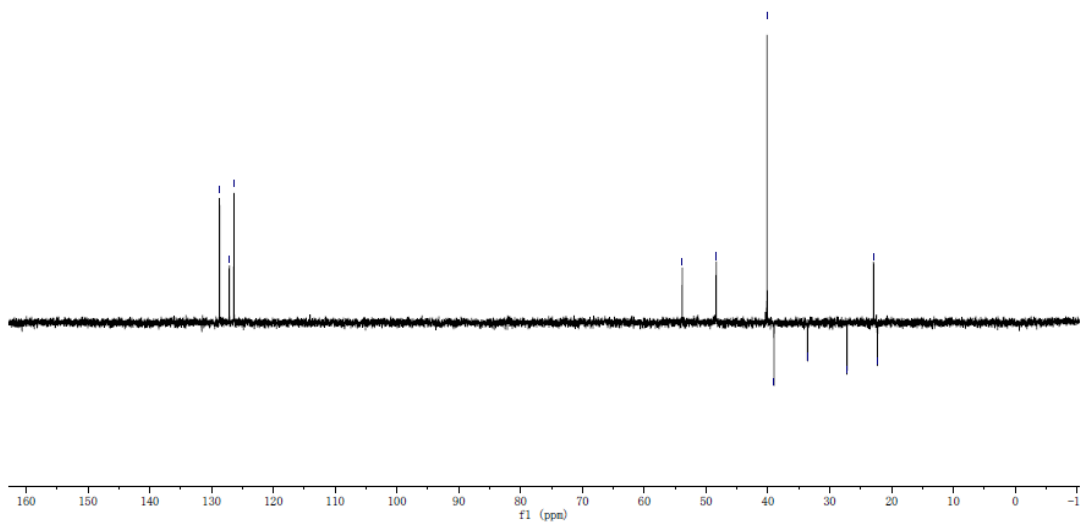

Imp-L DEPT DMSO 101 MHz



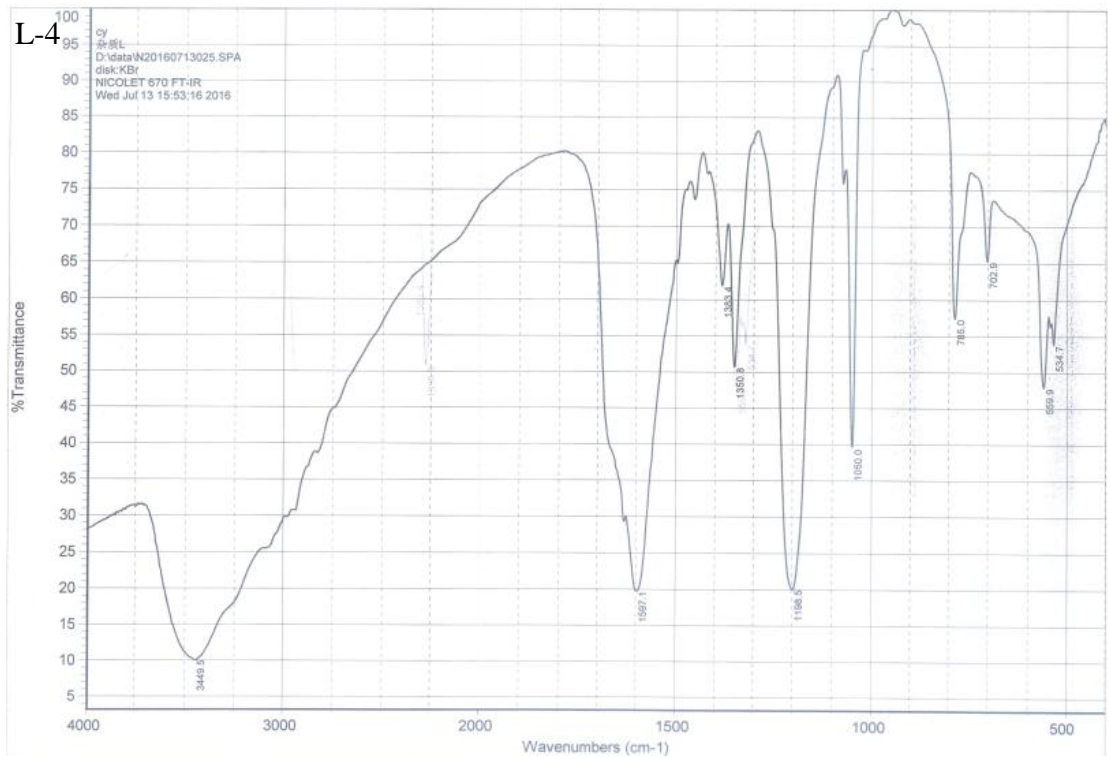

Imp-L IR

L-5

### Qualitative Compound Report

|                 |                |                        |              |
|-----------------|----------------|------------------------|--------------|
| Data File       | 20160630-012.d | Sample Name            | Impurity L   |
| Sample Type     | Sample         | Position               | Vial 48      |
| Instrument Name | Instrument 1   | User Name              |              |
| Acq Method      |                | IRM Calibration Status | Success      |
| DA Method       | MS.m           | Comment                | N20160630030 |

#### Compound Table

| Compound Label      | RT    | Mass     | Abund   | Formula      | Tgt Mass | Diff (ppm) |
|---------------------|-------|----------|---------|--------------|----------|------------|
| Cpd 1: C14 H23 N3 O | -0.25 | 249.1835 | 1176045 | C14 H23 N3 O | 249.1841 | -2.39      |

| Compound Label      | RT    | Algorithm       | Mass     |
|---------------------|-------|-----------------|----------|
| Cpd 1: C14 H23 N3 O | -0.25 | Find By Formula | 249.1835 |

#### MS Zoomed Spectrum

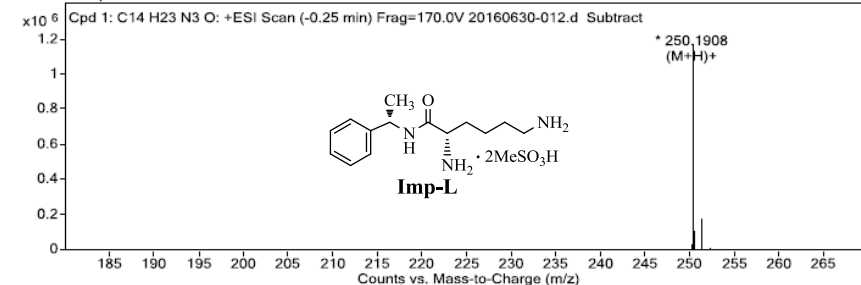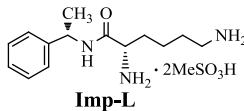

#### MS Spectrum Peak List

| m/z      | Calc m/z | Diff(ppm) | Abund   | Formula      | Ion                |
|----------|----------|-----------|---------|--------------|--------------------|
| 250.1908 | 250.1914 | -2.37     | 1176045 | C14 H24 N3 O | (M+H) <sup>+</sup> |

--- End Of Report ---

Imp-L HRMS



20180408044  
NO.: 20180408044  
Solvent: DMSO-d6  
Sample Name: LYBBA-YH

131.27 127.71 118.94 115.30 52.47 45.34 38.03 36.96 30.87 26.99 21.42 21.27

M-3

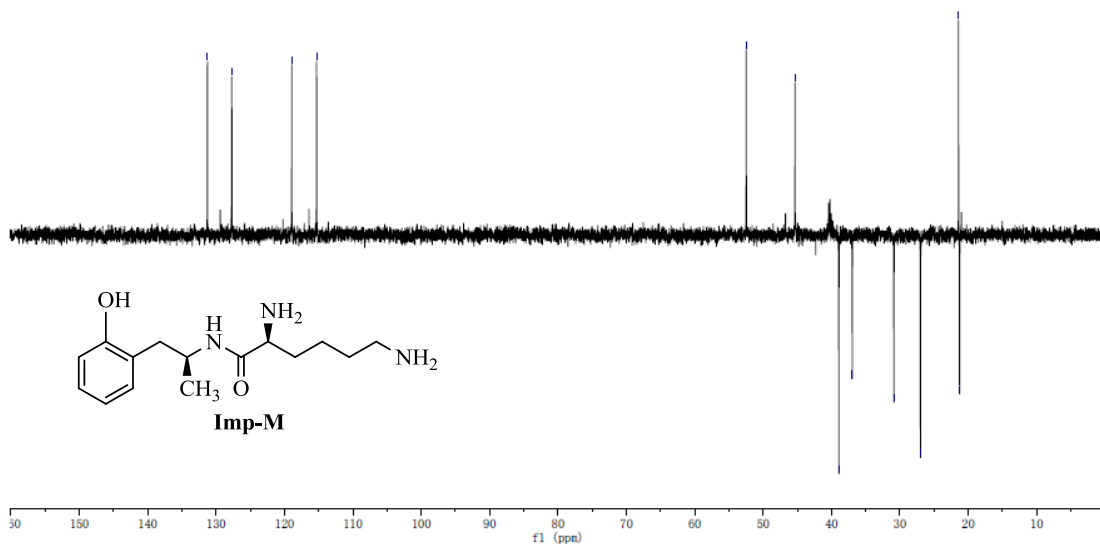

Imp-M DEPT DMSO 101 MHz

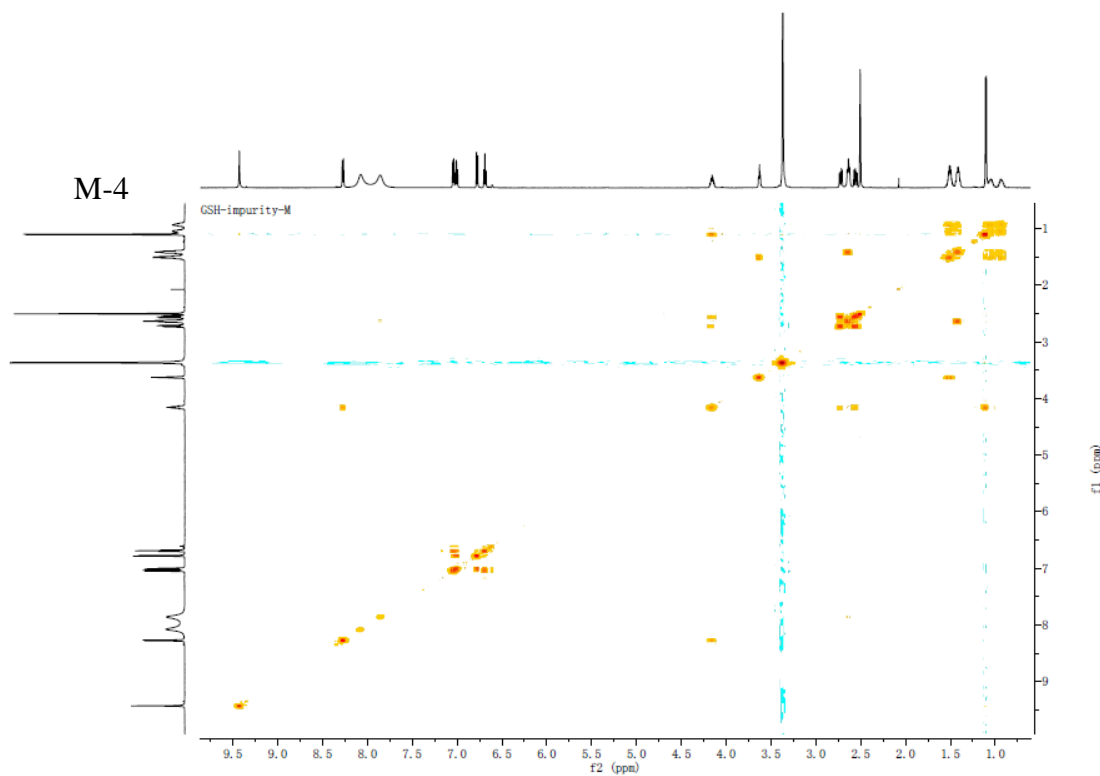

Imp-M COSY DMSO

M-5

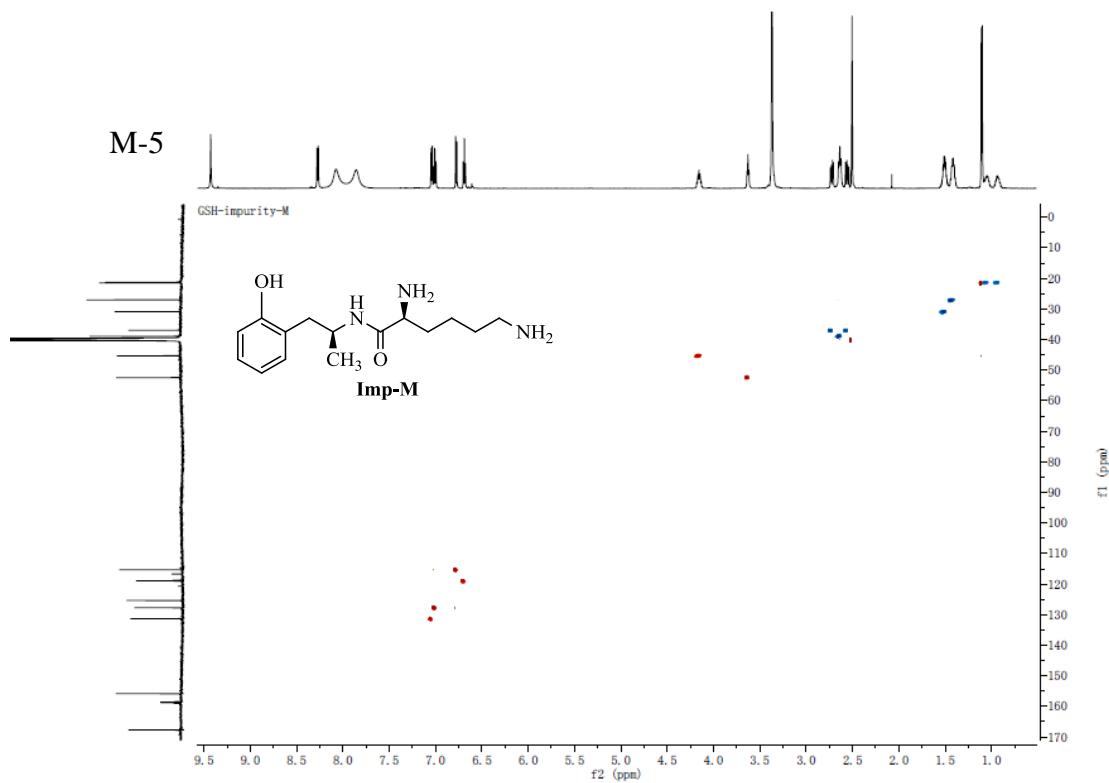

Imp-M HSQC DMSO

M-6

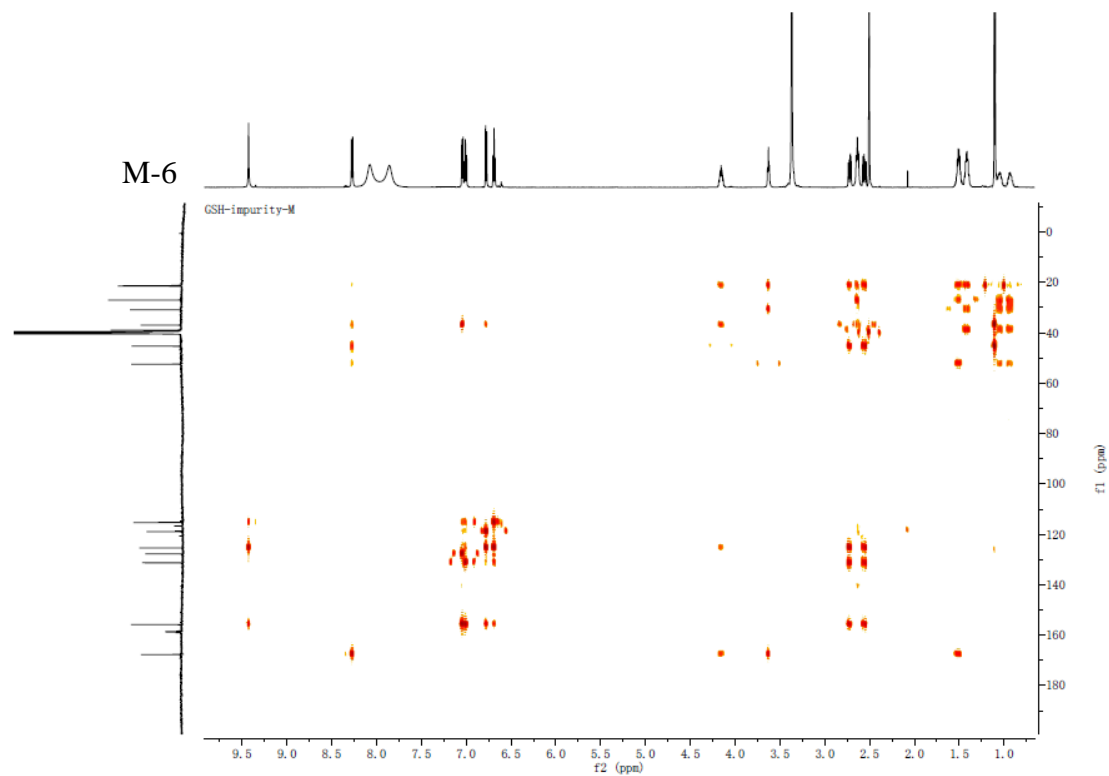

Imp-M HMBC DMSO

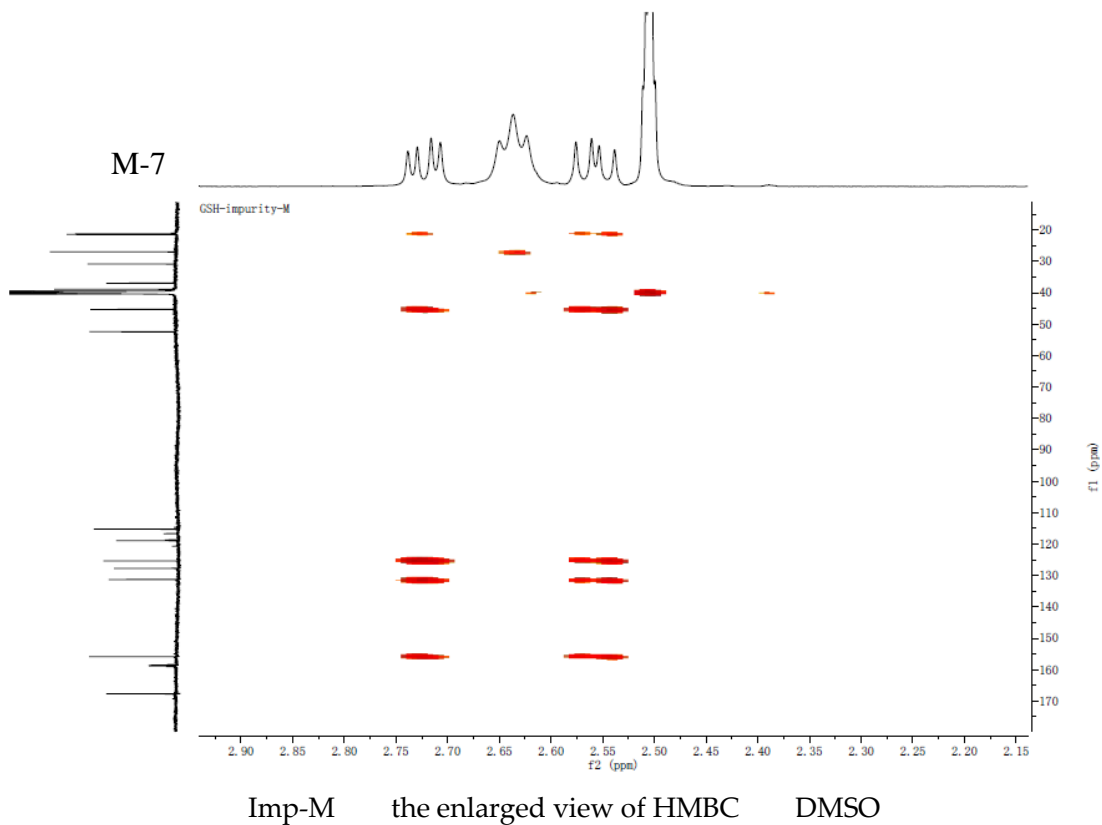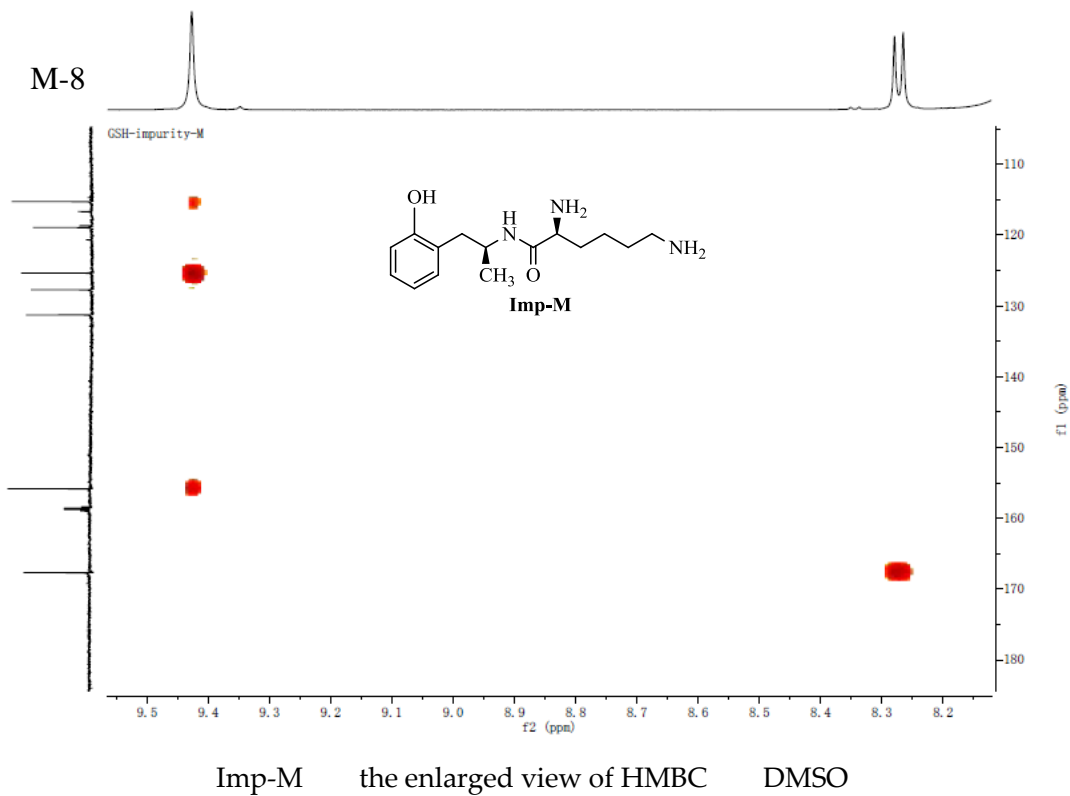

## M-9 Mass Spectrum SmartFormula Report

|                      |                                                       |                   |                      |
|----------------------|-------------------------------------------------------|-------------------|----------------------|
| <b>Analysis Info</b> |                                                       | Acquisition Date  | 1/31/2018 5:53:48 AM |
| Analysis Name        | D:\Data\SHUJV\FENXIMADAWEGROUP\LYBBA-2_GA3_01_10594.d | Operator          | BDAL@DE              |
| Method               | 20150915.m                                            | Instrument / Ser# | maXis 4G 21240       |
| Sample Name          | LYBBA-2                                               |                   |                      |
| Comment              |                                                       |                   |                      |

### Acquisition Parameter

|             |            |                       |           |                  |           |
|-------------|------------|-----------------------|-----------|------------------|-----------|
| Source Type | ESI        | Ion Polarity          | Positive  | Set Nebulizer    | 1.0 Bar   |
| Focus       | Not active | Set Capillary         | 4000 V    | Set Dry Heater   | 220 °C    |
| Scan Begin  | 50 m/z     | Set End Plate Offset  | -500 V    | Set Dry Gas      | 6.0 l/min |
| Scan End    | 1500 m/z   | Set Collision Cell RF | 600.0 Vpp | Set Divert Valve | Waste     |

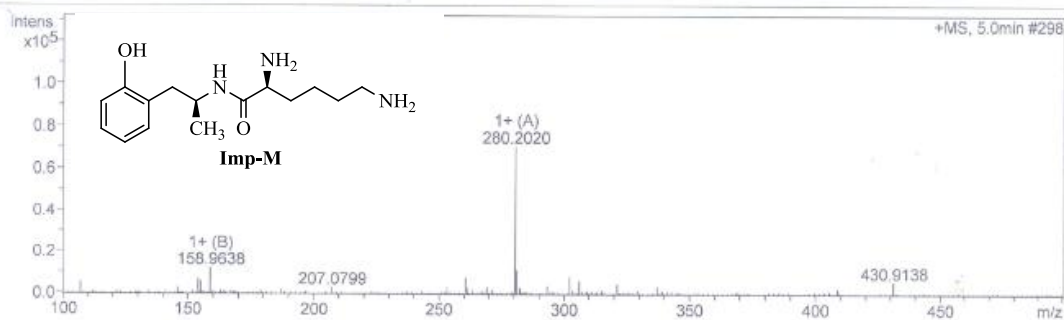

| Meas. m/z | # | Formula                                                       | Score  | m/z      | err [ppm] | Mean err [ppm] | mSigma | rdb | e <sup>-</sup> Conf | N-R rule |
|-----------|---|---------------------------------------------------------------|--------|----------|-----------|----------------|--------|-----|---------------------|----------|
| 280.2020  | 1 | C <sub>16</sub> H <sub>26</sub> N <sub>3</sub> O <sub>2</sub> | 100.00 | 280.2020 | -0.3      | -0.0           | 8.2    | 4.5 | even                | ok       |
|           | 2 | C <sub>18</sub> H <sub>27</sub> N <sub>3</sub> Na             | 34.06  | 280.2036 | 5.5       | 5.8            | 22.6   | 5.5 | even                | ok       |
|           | 3 | C <sub>10</sub> H <sub>24</sub> N <sub>8</sub> Na             | 0.00   | 279.2016 | 5.9       | 10.2           | 767.3  | 2.5 | even                | ok       |
|           | 4 | C <sub>13</sub> H <sub>28</sub> N <sub>5</sub> O              | 0.00   | 278.1962 | -1.5      | -5.6           | 812.7  | 0.5 | even                | ok       |
|           | 5 | C <sub>14</sub> H <sub>24</sub> N <sub>5</sub> O              | 0.00   | 278.1975 | 2.7       | 8.1            | 816.3  | 5.5 | even                | ok       |
|           | 6 | C <sub>12</sub> H <sub>25</sub> N <sub>5</sub> NaO            | 0.00   | 278.1951 | -6.5      | -0.5           | 816.3  | 2.5 | even                | ok       |

N20160708002  
 NI : 201611994  
 Solvent: D2O  
 Sample Name: N-epsilon-Boc-Lysine

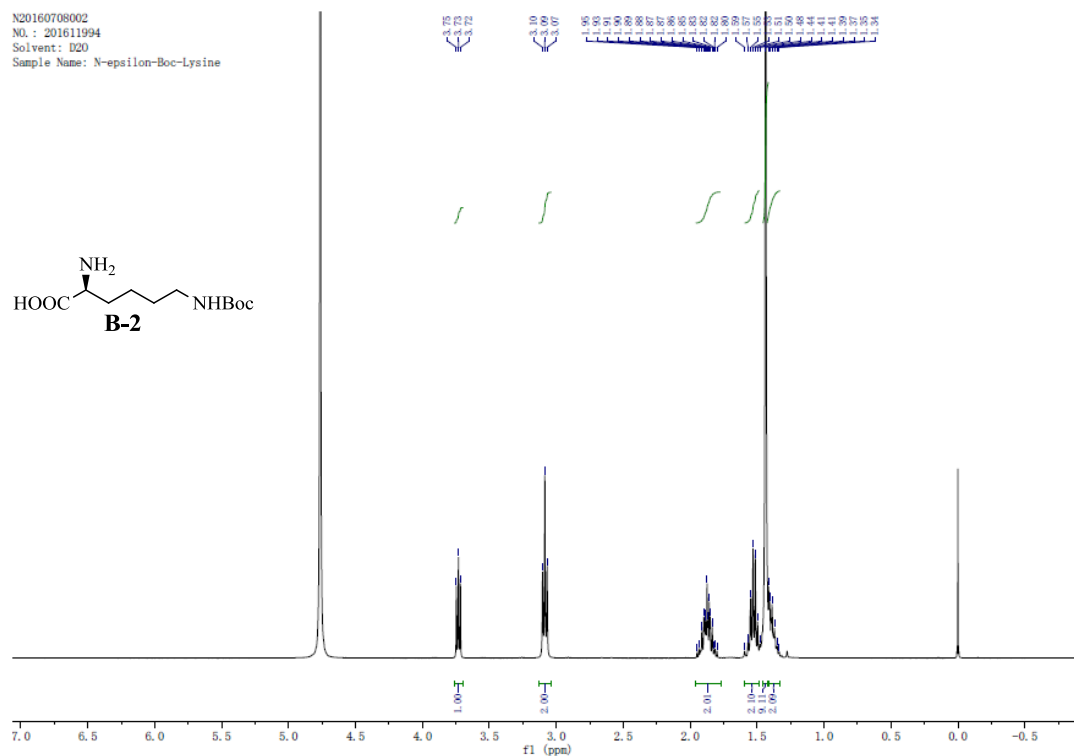

**B-2** <sup>1</sup>H NMR D<sub>2</sub>O 400 MHz

N20160708001  
NO : 201611993  
Solvent: D2O  
Sample Name: N-alpha-Boc-Lysine

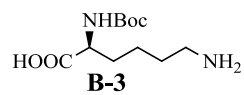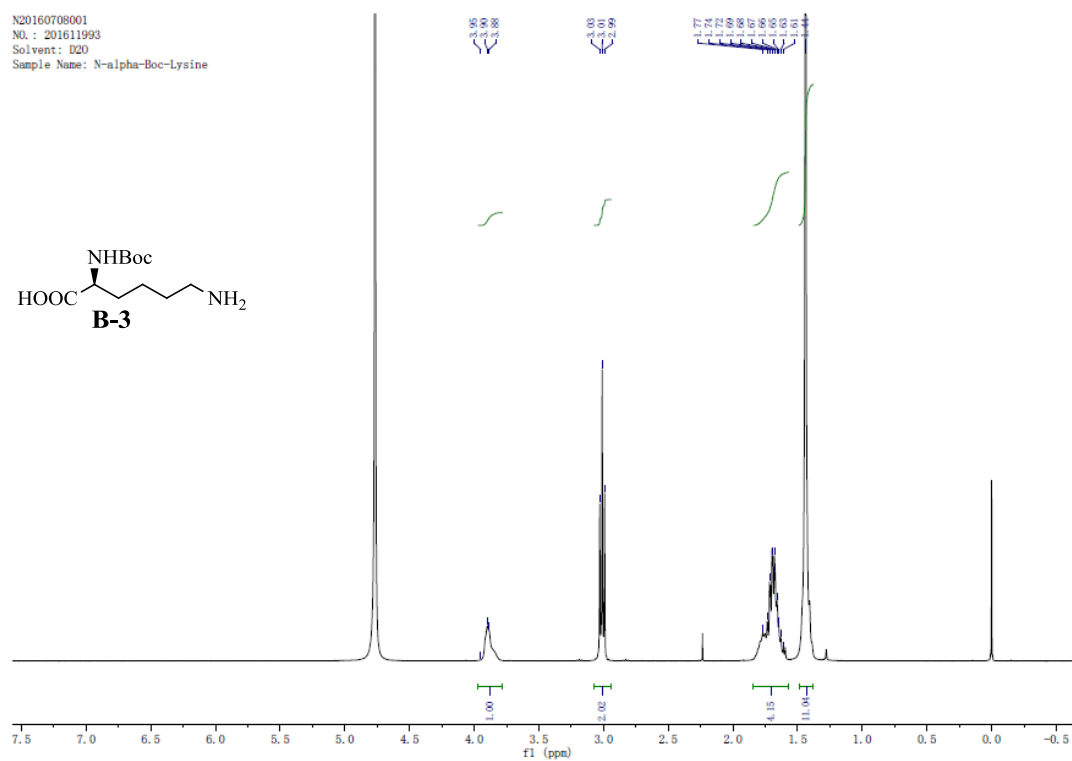

**B-3**  $^1\text{H}$  NMR  $\text{D}_2\text{O}$  400 MHz
